# Supplementary material for: Distinct regional meteorological influences on low cloud albedo susceptibility over global marine stratocumulus regions
Source: Copernicus journal article supplement (doi:10.5194/egusphere-2022-1127), 2022-10-28
Supplement: Supplementary file [file egusphere-2022-1127-AC1-supplement.pdf]

**Response to reviews of “Distinct regional meteorological influences on low cloud albedo susceptibility over global marine stratocumulus regions” by J. Zhang and G. Feingold.**

We would like to thank Johannes Mülmenstädt and another anonymous reviewer for their encouraging feedback and constructive comments and suggestions on our manuscript, which helped us improve the original manuscript.

Specific responses to each comment are contained below, with the reviewers’ comments provided in **blue** and our responses in **black**. Changes to the manuscript made in response to the reviewer are provided in *red italics*. We have also made unsolicited changes to the manuscript to further polish the writing.

**REVIEWER 1 (Johannes Mülmenstädt):**

I have reviewed “Distinct regional meteorological influences on low cloud albedo susceptibility over global marine stratocumulus regions” by Zhang and Feingold.

In my opinion, the key advance in this manuscript is a global regime-based understanding of cloud albedo susceptibility to aerosols. We have known for a long time that aerosol–cloud interactions can be very different (even have different sign) depending on regime, but here the authors are drawing on a regime classification that divides clouds up by ACI mechanism: the Twomey-dominated “non-precip brightening” and the rapid adjustment-dominated “precip brightening” and “non-precip darkening”. These regimes were developed in previous work by the authors, both process-understanding work in LES and observational work over one Sc region. What is new is a global perspective that shows that (a) different regimes dominate the ERFaci in different regions (near-shore Sc dominated by Twomey brightening, Sc to ShCu transition dominated by LWP adjustment dimming, and remote oceans dominated by LWP adjustment brightening) and (b) the covariability of meteorological controls in different regions, rather than individual meteorological controls on their own, modulate cloud susceptibility.

These results tie global albedo susceptibility (and thus ERFaci) to fundamental processes in a much more direct way than I have ever seen, bridging the gap between process studies (which are typically highly specific to a particular set of boundary conditions) and global observational studies (which often struggle with establishing causal relationships between aerosol and cloud properties because it is difficult to infer processes from observations). Many communities (including the global ERFaci, geoengineering, and process understanding communities) will take a keen interest. I recommend publication.

We really appreciate these encouraging comments and glad to see that the impacts and implications of our work is being acknowledged and appreciated.

My one minor revision suggestion stems from l. 265, “Our work is highly relevant to assessment of the radiative effect of aerosol-cloud interactions for climate applications.” I wholeheartedly agree with this statement. I think it would help the reader place these results in context if they

(the results, not the reader) were compared to the Bellouin et al. (2020) ERFaci range. More concretely, eqs. (14) and (24) in Bellouin [sticklers might note that (24) is not an equation] lead me to believe that we should be able to compare the occurrence-weighted  $F_0 = 32.9 \text{ W m}^{-2} (\ln Nd)^{-1}$  from Fig. 2a in the manuscript to the sum of RFaci and rapid adjustments per  $\Delta \ln Nd$  in Bellouin, i.e.,

$$\text{ERFaci}/\Delta \ln N_d = S_{NCN} + \beta_{\ln \mathcal{L} - \ln N_d} S_{\mathcal{L}, NC\mathcal{L}} + \beta_{\ln \mathcal{C} - \ln N_d} S_{\mathcal{C}, NC\mathcal{C}}. \quad (1)$$

These parameters are listed in Table 4 of Bellouin. (Parenthetically, I have plugged the central values from that table into (1) and get approximately  $-9 \text{ W m}^{-2} (\ln Nd)^{-1}$ . The disagreement in sign is a result of sign convention choices, but the factor 3 disagreement in magnitude puzzles me. I must be missing something obvious; perhaps the Bellouin number is all-sky and the manuscript number is cloudy-sky?)

This is an excellent point, and we thank the reviewer for raising it, as it provides an opportunity to compare with the radiative sensitivity assessments discussed in Bellouin et al. (2020).

First, we think the approach the reviewer took trying to compare Fig. 2a with Bellouin20's number is a great one, and thereby, we adopted it in the revised manuscript.

However, there are 2 factors that we need to consider first in order to make a fair comparison:

- 1) We haven't assessed the cloud fraction adjustments in this study. (LCF adjustments can be very impactful in terms of radiative responses, and we're planning to look at it in the next study). Therefore, when comparing to B20, we do not consider their rapid adjustment in cloud cover term, i.e., we drop the last term in the reviewer's Eqn. 1 (above).
- 2) The occurrence-weighted  $F_0$  we showed in the original Fig. 2a is actually weighted only by the freq of occurrence of individual LWP-Nd bins (i.e., they sum-up to almost 100%). Thus, the frequency of occurrence of these cloudy scenes has not yet been taken into account in these numbers, which is why they differ significantly from B20's assessment.

In order to make a fair comparison, we derived an effective cloud frequency factor, taking into account the spatial covariability between  $F_0$  and the frequency of occurrence of high-fc scenes ( $\text{scene}_{\text{freq}}$ ), which takes the form:

$$\text{freq}_{\text{eff}} = \frac{\langle \text{scene}_{\text{freq}} \times F_0 \rangle}{\langle F_0 \rangle}$$

Then, we scale the original occurrence-weighted  $F_0$  values by this factor, globally and also regionally (separately derived). This puts us within the bounds provided in B20, and in fair agreement with B20 (cooling  $\sim 3.8 \text{ W/m}^2/\ln(Nd)$ , using their central values), with our Aqua assessment being  $\sim 2.0 \text{ W/m}^2/\ln(Nd)$  and Terra assessment being  $3.1 \text{ W/m}^2/\ln(Nd)$ . The difference likely stems from the focus of our study on marine-only high-fc scenes, whereas B20 integrates evidence from both modeling and satellite studies that cover global warm clouds.

We added a new sub-section (3.3 Scale-up of the  $F_0$  assessment) to the revised manuscript to include this scale-up of our results to compare with Bellouin20.

I am also attaching an annotated copy of the manuscript with a number of minor typo corrections, typesetting pedantry, and suggestions that the authors should feel free to adopt or ignore.

These questions and editorial comments are super helpful and enlightening, as they have encouraged us think deeply about the implications of our results. We have incorporated them into the revised manuscript and responded to them individually (please see the attached annotated copy of the original manuscript with point-to-point responses). Tracked changes between the original manuscript and the revised version can be found in the resubmission package.

## **REVIEWER 2:**

This paper utilizes MODIS cloud observations and environmental variables from ERA-5 to analyze the meteorological influences on low-cloud susceptibility. They find that non-precipitative brightening typically occurs near the coast in primarily stratocumulus regions, precipitative brightening is most frequent over the central oceans, and darkening occurs predominately in the stratocumulus regions of the southeast Pacific and Atlantic (west of the non-precipitative brightening region). Regarding any meteorological influences, they found that the co-variability between the different variables analyzed influences the monthly evolution of albedo susceptibility, and differs depending on region.

Overall, I think this is a well written paper with impactful results, however I do have a few questions (listed below) that I would like answered prior to publication.

We thank the reviewer for these encouraging comments and helpful suggestions.

### General Comments/Questions:

Lines 119 – 120: Regarding the precipitation brightening regime shown in Figure 2 and discussed here, “to the left of the 12-15 microns” means all susceptibility values to the left of the 12-micron isoline (not between the 12- and 15-micron isolines)?

We apologize for this confusing statement, which should have been “*...to the left of the 12 micron*”, meaning all susceptibility values to the left of 12-micron isoline. This is corrected in the revised manuscript.

Lines 124 – 126: You discuss how heavy precipitation would reduce cloud water through drop scavenging but state that your focus on high-cloud-fraction scenes does not allow you to analyze this (If I understand correctly). How do you think your results would have changed if you could

have analyzed scenes where scavenging had occurred. Maybe I completely missed this point, but was curious about it.

Thanks for raising this question. We realized our sentences here weren't that clear and might mislead the reader.

Our point here is that heavy precipitating scenes do not represent a true cloud susceptibility to aerosol, and therefore we want to avoid these scenes (i.e., do not want to include them in our analysis). This is mostly ensured by focusing on high-fc scenes only, as heavily precipitating scenes are likely low fc scenes.

Here is our reasoning for this:

- 1) There are likely 3 processes occurring in precipitating stratocumulus scenes, a) precip-suppression (+ve LWP-Nd slope), b) precipitation scavenging (i.e. depleting LWP and Nd at the same time,  $\rightarrow$  +ve LWP-Nd slope), and c) collision-coalescence & accretion (i.e. more LWP, less Nd,  $\rightarrow$  -ve LWP-Nd slope).
- 2) What we really want to quantify, as susceptibility, is the precip-suppression process, not the other two.
- 3) Focusing on high-fc scenes certainly helped us minimize the likelihood of precip-scavenging, as this usually occurs with heavy precipitation, i.e., low fc; and process c) is certainly not strong enough to change the overall S0 here to -ve (Fig. 2).

Discussion around this is now revised and reads as *"The focus on high-fc scenes removes scenes with heavy precipitation, which is desirable since precipitation represents a cloud/rain effect on aerosol rather than an aerosol effect on cloud albedo."*

Lines 160 – 163 and Figure 3: It looks like precipitation brightening is most frequent over the entire ocean basins other than right near the coast (especially in regions of primarily stratocumulus). Is this what you mean in the sentence starting "The precipitating brightening regime, although occurring over 50% of the time"?

This is exactly the point we want to make.

In order to make this more clear, we rephrased it a bit to now read *"The precipitating brightening regime, although occurring over 50% of the time over most parts of the remote, clean oceans and the equatorial eastern Pacific (Fig. 3c), contributes little to the overall FO (Fig. 4c)..."*

Minor comments:

Lines 30 – 35: "Simulations of marine boundary layer (MBL) clouds," this sentence is a bit clunky (i.e. a bunch of comma splices) which reduces its readability. If you could break it up, that would be appreciated.

Thanks for pointing this out! Indeed, it's a long and hard to follow sentence, which is now broken into 3 sentences in the revised manuscript.

Line 76: What does  $f_c$  represent in the radiative susceptibility equation?

Sorry for the confusion; this ' $f_c$ ' is now consistent with the symbol used for cloud fraction which is introduced earlier at the beginning of Section 2, after a typesetting correction. Thanks for pointing this out.

Line 124: "Heavy precipitations deplete" should be "Heavy precipitation depletes"

Thanks, and corrected.

Figure 6: It took me three reads to see the contour labels (i.e. lines of constant  $F_0$ ) in the left plot of each panel (a-e). This made my interpretation of some of the text (e.g. lines 218 – 219: discussing that the southeast Pacific has the only monthly mean darkening potential) difficult.

Yes, indeed, we realized that these "spider-web" plots can be quite overwhelming when labels are overlaid with actual data curves, therefore we have revised the way we show these plots. We now remove all labels on the plot and have added a legend box to each figure (Figs. 7-9) showing empty "spider-webs" with labels but without any data. We believe these figures are now much easier to read.

I have reviewed “Distinct regional meteorological influences on low cloud albedo susceptibility over global marine stratocumulus regions” by Zhang and Feingold.

In my opinion, the key advance in this manuscript is a global regime-based understanding of cloud albedo susceptibility to aerosols. We have known for a long time that aerosol–cloud interactions can be very different (even have different sign) depending on regime, but here the authors are drawing on a regime classification that divides clouds up by ACI mechanism: the Twomey-dominated “non-precip brightening” and the rapid adjustment-dominated “precip brightening” and “non-precip darkening”. These regimes were developed in previous work by the authors, both process-understanding work in LES and observational work over one Sc region. What is new is a global perspective that shows that (a) different regimes dominate the ERFaci in different regions (near-shore Sc dominated by Twomey brightening, Sc to ShCu transition dominated by LWP adjustment dimming, and remote oceans dominated by LWP adjustment brightening) and (b) the covariability of meteorological controls in different regions, rather than individual meteorological controls on their own, modulate cloud susceptibility.

These results tie global albedo susceptibility (and thus ERFaci) to fundamental processes in a much more direct way than I have ever seen, bridging the gap between process studies (which are typically highly specific to a particular set of boundary conditions) and global observational studies (which often struggle with establishing causal relationships between aerosol and cloud properties because it is difficult to infer processes from observations). Many communities (including the global ERFaci, geoengineering, and process understanding communities) will take a keen interest. I recommend publication.

My one minor revision suggestion stems from l. 265, “Our work is highly relevant to assessment of the radiative effect of aerosol-cloud interactions for climate applications.” I wholeheartedly agree with this statement. I think it would help the reader place these results in context if they (the results, not the reader) were compared to the Bellouin et al. (2020) ERFaci range. More concretely, eqs. (14) and (24) in Bellouin [sticklers might note that (24) is not an equation] lead me to believe that we should be able to compare the occurrence-weighted  $F_0 = 32.9 \text{ W m}^{-2} (\ln N_d)^{-1}$  from Fig. 2a in the manuscript to the sum of RFac and rapid adjustments per  $\Delta \ln N_d$  in Bellouin, i.e.,

$$\text{ERFaci}/\Delta \ln N_d = S_{NCN} + \beta_{\ln \mathcal{L} - \ln N_d} S_{\mathcal{L}, NC\mathcal{L}} + \beta_{\ln \mathcal{C} - \ln N_d} S_{\mathcal{C}, NCC}. \quad (1)$$

These parameters are listed in Table 4 of Bellouin. (Parenthetically, I have plugged the central values from that table into (1) and get approximately  $-9 \text{ W m}^{-2} (\ln N_d)^{-1}$ . The disagreement in sign is a result of sign convention choices, but the factor 3 disagreement in magnitude puzzles me. I must be missing something obvious; perhaps the Bellouin number is all-sky and the manuscript number is cloudy-sky?)

I am also attaching an annotated copy of the manuscript with a number of minor typo corrections, typesetting pedantry, and suggestions that the authors should feel free to adopt or ignore.

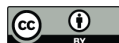

# Distinct regional meteorological influences on low cloud albedo susceptibility over global marine stratocumulus regions

Jianhao Zhang<sup>1,2</sup> and Graham Feingold<sup>2</sup>

<sup>1</sup>Cooperative Institute for Research in Environmental Sciences (CIRES), University of Colorado, Boulder, CO, USA

<sup>2</sup>Chemical Sciences Laboratory, National Oceanic and Atmospheric Administration (NOAA), Boulder, CO, USA

**Correspondence:** Jianhao Zhang (jianhao.zhang@noaa.gov)

**Abstract.** Marine stratocumuli cool the Earth effectively due to their high reflectance of incoming solar radiation, and persistent occurrence. The susceptibility of cloud albedo to droplet number concentration perturbations depends strongly on large-scale meteorological conditions. Studies focused on the meteorological dependence of cloud adjustments often overlook the covariability among meteorological factors and their geographical and temporal variability. We use 8 years of satellite observations sorted by day and geographical location to show the global distribution of marine low cloud albedo susceptibility. We find an annual mean cloud brightening potential for most of the regions, more pronounced over subtropical coastal regions. Weak cloud darkening potential in the annual mean is evident over the remote SE Pacific and SE Atlantic. We show that large-scale meteorological fields from the ERA5 reanalysis data, including lower-tropospheric stability, free-tropospheric relative humidity, sea surface temperature, and boundary layer depth, have distinct covariabilities over each of the eastern subtropical ocean basins where marine stratocumulus prevail. This leads to markedly different monthly evolution in albedo susceptibility over each basin. Moreover, we find that basin-specific regional relationships between key meteorological factors and albedo susceptibilities are absent in a global analysis. Our results stress the importance of considering the geographical distinctiveness of temporal meteorological covariability when scaling up the local-to-global response of cloud albedo to aerosol perturbations.

## 1 Introduction

Marine warm (liquid) clouds cover about one third of the global ocean surface in annual mean (Chen et al., 2014). They prevail over low-latitude to mid-latitude oceans, more pronouncedly over the eastern subtropical oceans where the Earth's major semi-permanent marine stratocumulus decks form (Klein and Hartmann, 1993; Wood, 2012). These bright and blanket-like stratiform clouds reflect a good fraction of the incident solar radiation (ranging from 0.35 to 0.42 in annual mean; Bender et al., 2011) that would otherwise (in the absence of these clouds) be largely absorbed by the dark ocean (~94%), effectively cooling the Earth (e.g. Stephens et al., 2012). For warm clouds exhibiting constant macrophysical properties (e.g., liquid water path (LWP) and cloud cover), their brightness, or cloud albedo ( $A_c$ ), quantified as the ratio of the reflected shortwave flux to the incoming solar radiation at the top of atmosphere, is particularly sensitive to the droplet concentration ( $N_d$ ), such that higher  $N_d$  accompanied by smaller drops makes the cloud more reflective (cloud brightening; Twomey, 1974, 1977). However, cloud macrophysical properties do change with time as the system evolves, through precipitation, evaporation, and/or entrainment mixing processes

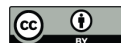

25 (Wood, 2012). Microphysical changes in  $N_d$  and droplet sizes induced by aerosol perturbations can substantially modulate the rate and efficiency of these processes and thereby cause further adjustments in macrophysical properties and cloud albedo (e.g. Ackerman et al., 2004; Bretherton et al., 2007; Jiang et al., 2006).

In nature, the responses of cloud macrophysical properties to  $N_d$  perturbations are always complicated by the variability driven by local meteorology, and for decades, the stated challenge and focus has been to untangle aerosol effects from covarying meteorological conditions (Stevens and Feingold, 2009). Simulations of marine boundary layer (MBL) clouds, in which meteorology can be easily controlled, indicate a bidirectional LWP adjustment to increasing  $N_d$ , such that for precipitating clouds, an increase in  $N_d$  induces smaller droplets that suppress condensate removal, eventually leading to an increase in LWP (brighter clouds; Albrecht, 1989), whereas for non-precipitating clouds, the reduced droplet sizes lead to weaker sedimentation fluxes at cloud tops; (Bretherton et al., 2007) and faster evaporation (Wang et al., 2003; Xue and Feingold, 2006), which both cause stronger entrainment mixing that reduce cloud LWP, resulting in less reflective clouds.

Observations of cloud adjustments following anthropogenic aerosol perturbations confirm the bidirectional LWP responses (e.g. Chen et al., 2012; Trofimov et al., 2020), while the aggregated response remains uncertain (Malavelle et al., 2017; Toll et al., 2019; Christensen et al., 2022). This means that cloud LWP responses to increased  $N_d$  can either enhance or offset the microphysical brightening depending on the meteorological conditions. Progress has been made over the years towards establishing fundamental knowledge of the environmental state/regime dependence of cloud adjustments to aerosol perturbations. For inversion-capped MBL clouds, the budget of cloud condensate is regulated mainly by entrainment drying at cloud tops and the fraction of precipitation that reaches the surface, which are strongly dependent on the humidity in the free-troposphere and the lower-tropospheric stability (Ackerman et al., 2004; Chen et al., 2014; Gryspeerd et al., 2019). In part related to the atmospheric stability, clouds exhibit a much more negative LWP response to increased  $N_d$  in deep MBLs than those that reside in shallower MBLs (e.g. Possner et al., 2020; Toll et al., 2019). Furthermore, Dagan et al. (2015) show that the direction in which cloud condensate responds to an increase in aerosol depends on an optimal aerosol concentration which is determined by thermodynamic conditions (e.g., temperature and humidity). Wood (2007) shows that cloud-base height is the single most important determinant of whether cloud thickness changes will enhance or offset the Twomey brightening.

Clearly, the spatiotemporally scaling up (e.g. local-to-global and/or transient-to-climatology) of cloud albedo responses to aerosol perturbations depends crucially on the frequency of occurrence of the environmental states that characterize cloud adjustments. However, the spatiotemporal distribution of the covariability between meteorological and aerosol conditions is understudied and often ignored in “untangling” studies. Mülmenstädt and Feingold (2018) state the need for a shift in attention from untangling aerosol effects from covarying meteorology towards embracing and understanding the covariabilities between them. The focus of this study is exactly on this point.

Using 8 years of satellite observations and the ERA5 reanalysis dataset (introduced in Section 2), we characterize the geographical distribution of marine warm cloud albedo susceptibility over global oceans from 60° S to 60° N (Section 3). We show that similar free-tropospheric and boundary layer conditions lead to different albedo susceptibilities in different stratocumulus basins (Section 4), attributed to the distinct temporal covariabilities among large-scale meteorological conditions (Section 5.1). We find distinct monthly evolutions of albedo susceptibility in different stratocumulus basins, covarying with





60 each basin's low cloud frequency of occurrence and aerosol conditions (Section 5.2). We conclude that a frequency-weighted global aggregation of albedo-susceptibility-meteorology relationships obscures regionally distinct features and thus provides a biased view on the environmental dependence of albedo susceptibility.

## 2 Data and Methods

We obtain coincident marine low-cloud properties, including cloud optical depth ( $\tau$ ), cloud top effective radius ( $r_e$ ), low-cloud  
65 fraction ( $f_c$ ), cloud LWP, cloud top height (CTH), and top-of-atmosphere (TOA) shortwave (SW) fluxes from the MODerate resolution Imaging Spectroradiometer (MODIS) (Platnick et al., 2003) and the Clouds and the Earth's Radiant Energy Systems (CERES; Wielicki et al., 1996) sensors onboard the Terra and Aqua satellite (overpass  $\sim 10:30$  and  $\sim 13:30$  local time, respectively), which are integrated into the CERES Single Scanner Footprint (SSF) product Edition 4 (level 2) with a footprint resolution of 20 km (Su et al., 2015).  $N_d$  is calculated following Zhang et al. (2022) for all CERES footprints with cloud  
70 effective temperature greater than 273 K, CTH less than 3 km,  $\tau > 3$ ,  $r_e > 3 \mu\text{m}$ , solar zenith angle  $< 65^\circ$ , and  $f_c > 0.8$ , in order to minimize retrieval biases (Grosvenor et al., 2018; Painemal et al., 2013; Grosvenor and Wood, 2014). Footprint cloud properties are aggregated to  $1^\circ$  spatial resolution, using only above mentioned cloudy footprints where  $N_d$  is retrieved, to match susceptibilities calculated for individual  $1^\circ \times 1^\circ$  satellite snapshots. At this scale, the confounding effect of meteorology on footprint (i.e. sub- $1^\circ$ ) cloud properties is negligible (Goren and Rosenfeld, 2012, 2014). Therefore, linear least-squares log-log  
75 regressions of footprint properties are used to calculate albedo susceptibility  $S_0 = d \ln(A_c) / d \ln(N_d)$  and radiative susceptibility  $T_0 = d(A_c) / d \ln(N_d) \times f_c \times SW_{dn}$ ; for both metrics, positive values indicate more reflected sunlight, thereby cooling, following Zhang et al. (2022). Note that in calculating  $S_0$  we do not stratify by LWP, which differentiates our method from that of Painemal (2018) and Rosenfeld et al. (2019). The logarithmic transformation alleviates the dependence of  $S_0$  on the absolute value of  $N_d$ , minimizing the impact of the remaining  $N_d$  retrieval biases (e.g. due to the adiabatic assumption).

80 Meteorological conditions, including sea surface temperature (SST), lower tropospheric temperature, humidity, and wind profiles, are obtained from the European Centre for Medium-Range Weather Forecasts (ECMWF) fifth-generation atmospheric reanalysis (ERA5; Hersbach et al., 2020), and interpolated and aggregated to the Terra and Aqua overpass times at  $1^\circ$  spatial resolution. Lower-tropospheric-stability (LTS) is calculated as the difference in potential temperature between 700 hPa and 1000 hPa. Free-tropospheric relative humidity ( $RH_{ft}$ ) is defined as the the mean relative humidity between inversion top and  
85 700 hPa, following Eastman and Wood (2018).

The datasets span  $60^\circ$  S to  $60^\circ$  N, covering global oceans, from 2005 to 2012 (8 years). We screen for cloudy satellite scenes over open water when only single layer liquid cloud (SLLC) is present. Aqua and Terra observations are analyzed separately, instead of collectively, in order to assess robustness of our findings (qualitatively); and to explore the role of the diurnal cycle (quantitatively). Analyses using the Aqua observations are shown in the main text, and those using the Terra observations are  
90 shown in the supplementary material, given the similarity between Aqua and Terra results. Regional annual maxima in SLLC fractional coverage and frequency of occurrence are used to identify 5 major marine stratus/stratocumulus regions ( $20^\circ \times 20^\circ$ , Fig. S1, magenta boxes).

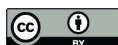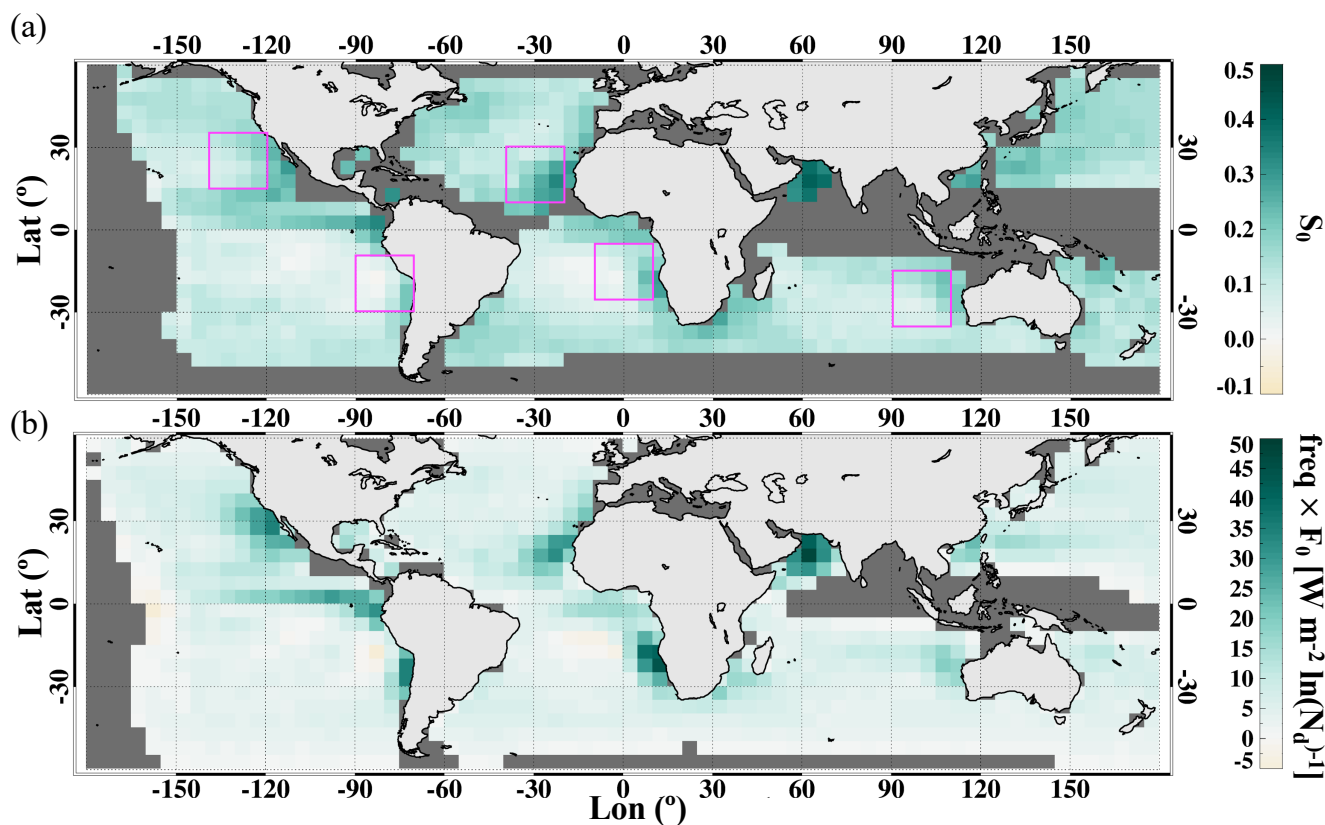

**Figure 1.** Geographical distribution of marine low-cloud (a) albedo susceptibility ( $S_0$ ) and (b) the product of radiative susceptibility ( $F_0$ ) and annual frequency of occurrence of single layer liquid cloud (SLLC). Spatial-temporal averages of  $5^\circ \times 5^\circ$  areas are shown. Only areas with SLLC frequency of occurrence greater than 0.1 are shown in (a). Magenta boxes in (a) indicate five  $20^\circ \times 20^\circ$  marine stratocumulus regions analyzed further in this study

### 3 Global distribution of marine low cloud albedo susceptibility

#### 3.1 Annual mean

95 The climatology of geographical distribution of marine low-cloud  $S_0$  (Fig. 1a) is represented by an aggregation of suscep-  
 100 tibilities derived from individual satellite snapshots over the 8-year period, taking into account the frequency of occurrence  
 of different cloudy scenes and meteorological regimes. It is clear that over most parts of the global ocean ( $60^\circ \text{S}$  to  $60^\circ \text{N}$ ),  
 low clouds have a brightening potential (positive  $S_0$ ) in the annual mean, more pronouncedly off the coast of continental land  
 masses where  $N_d$  is climatologically higher (Fig. S2) and the MBL is shallower (Fig. S3), compared to those over remote  
 oceans. Only over the remote subtropical southeast Pacific/Atlantic regions, do the data show weak darkening potential (nega-

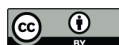

five  $S_0$ ) in the annual mean. The darkening potential means that the brightening of the clouds via the Twomey effect – i.e. more particles lead to more droplets and brighter clouds – is more than compensated by liquid water losses.

One can then translate the  $S_0$  map into an annual flux perturbation potential map (Fig. 1b), which highlights the high annual cooling potential over subtropical stratocumulus regions even more, by taking into account the cloud fraction and frequency and amount of incoming solar radiation at a given geographical location. In the remote parts of the subtropical stratocumulus decks, warmer SSTs deepen the MBL and encourage entrainment of free-tropospheric air at cloud tops (Fig. S3 and Bretherton, 1992; Wyant et al., 1997), favoring entrainment-feedback-driven LWP decreases with increasing  $N_d$  (Bretherton et al., 2007; Wang et al., 2003). The location where this MBL condition prevails is consistent with the location where we observe cloud darkening potential offsetting the Twomey brightening potential in the annual mean, resulting in a net warming potential over the southeast Pacific/Atlantic (Fig. 1b).

### 3.2 Brightening versus darkening regimes

The LWP– $N_d$  variable space has been shown as a useful framework to infer process-level understanding of aerosol-cloud interactions, using satellite observations (e.g. Zhang et al., 2022) or cloud-resolving simulation outputs (e.g. Glassmeier et al., 2019; Hoffmann et al., 2020). Here we show  $S_0$  in the LWP– $N_d$  variable space for the five major stratocumulus regions (Fig. 2), similar to Fig. 3 in Zhang et al. (2022), where 3 clearly separated susceptibility regimes are evident. Note although  $S_0$  is shown for each LWP– $N_d$  bin, the calculation of  $S_0$  applied to individual Terra/Aqua snapshots is not stratified by LWP (see details in Section 2), and thereby, both LWP adjustments and the Twomey effect contribute to these albedo susceptibilities at different LWP– $N_d$  states. The 3 regimes are:

1. *Precipitating brightening*. This regime consists of clouds with larger droplets (i.e. high cloud liquid water but low droplet number; to the left of the 12–15  $\mu\text{m}$  isolines) that are likely to precipitate (Gerber, 1996; vanZanten et al., 2005). A positive susceptibility (brighter clouds with higher  $N_d$ ) is consistent with the Twomey effect (microphysical adjustment; Twomey, 1974, 1977) and the precipitation-suppression induced lifetime effect (macrophysical adjustment; Albrecht, 1989). Both effects contribute to the cloud brightening potential of this regime, and we do not attempt to separate them, as “untangling” is not the goal of this study. Heavy precipitations deplete cloud liquid water through removing cloud droplets – a positive relationship between LWP and  $N_d$ , however, the focus on high-cloud-fraction scenes precludes the role of precipitation-scavenging in driving the observed positive susceptibility in this regime.
2. *Darkening*. For clouds that are not heavily precipitating, cloud top entrainment drives a negative tendency in cloud LWP that can overcome the positive tendencies driven by LW cooling and surface fluxes and lead to cloud thinning and/or breakup (Hoffmann et al., 2020). A decrease in  $r_e$  and increase in  $N_d$  (assuming constant LWP when clouds respond microphysically to aerosol perturbations) lead to an increase in the overall droplet surface area, enhancing droplet evaporation; meanwhile, sedimentation fluxes at cloud tops reduce with smaller droplets. Enhanced evaporation and reduced sedimentation at cloud tops cause stronger entrainment mixing which further enhances evaporation and reduces sedimentation, creating positive feedback loops, termed as the entrainment-evaporation feedback (EEF; Wang et al., 2003; Xue

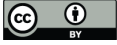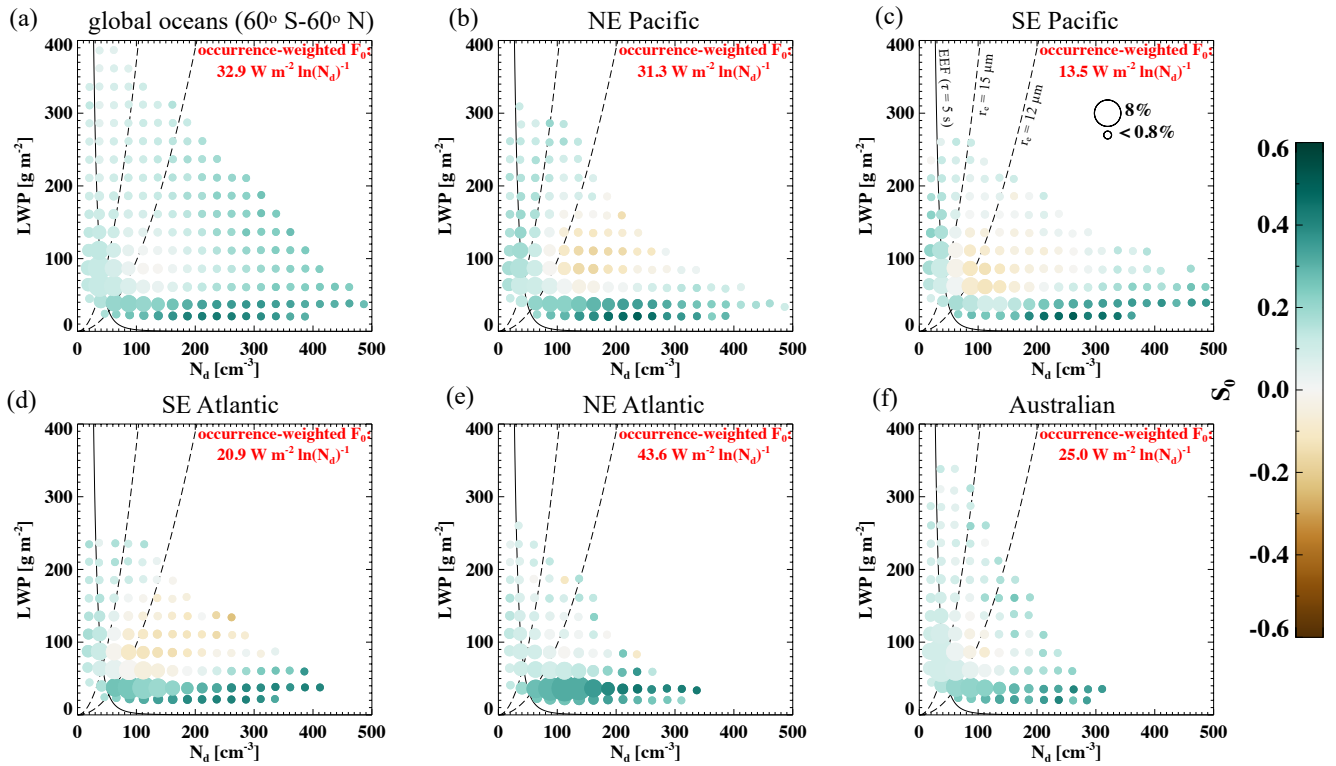

**Figure 2.** Cloud albedo susceptibility ( $S_0$ , colored filled circles) in LWP– $N_d$  variable space, as bin means (bin size of  $25 \text{ g m}^{-2}$  and  $25 \text{ cm}^{-3}$ ), for (a) global oceans ( $60^\circ \text{ S} - 60^\circ \text{ N}$ ), and  $20^\circ \times 20^\circ$  boxes over (b) NE Pacific, (c) SE Pacific, (d) SE Atlantic, (e) NE Atlantic, and (f) Australian stratocumulus regions. The size of the circles indicates the frequency of occurrence of a LWP– $N_d$  bin (reference circle sizes with corresponding occurrence are indicated on panel (c)). Bins with less than 0.01% frequency of occurrence (or less than 25 samples) are not shown. Isolines of evaporation–entrainment feedback (EEF; phase relaxation timescale of 5 s) and isolines of  $r_e$  of 12 and  $15 \mu\text{m}$  based on an adiabatic condensation rate of  $2.14 \times 10^6 \text{ kg m}^{-4}$  (black dashed; commonly used measures of precipitation) are indicated on panel (c). Mean radiative susceptibility ( $F_0$ ) weighted by the frequency of occurrence of each LWP– $N_d$  bin is printed in red (named occurrence-weighted  $F_0$ ).



135 and Feingold, 2006) and the sedimentation-entrainment feedback (SEF; Bretherton et al., 2007), respectively. Moreover, SW heating during daytime, which can also be enhanced by increasing  $N_d$  and decreasing  $r_e$ , contribute to cloud thinning and/or breakup as well (Petters et al., 2012). The negative susceptibilities (darker clouds with higher  $N_d$ ), evident in 4 of the 5 stratocumulus regions for thicker clouds ( $LWP > 50 \text{ g m}^{-2}$ ) with higher droplet number concentration ( $N_d > 50 \text{ cm}^{-3}$ ) (Fig. 2b-d, f), are an indication that the Twomey effect is more than compensated by these cloud thinning processes that can be enhanced by a reduction in droplet sizes. Here we exclude the possibility of aerosol direct and semi-direct effects driving the cloud darkening, as the  $S_0$  shown in this study is calculated at  $1^\circ$  resolution, a scale at which we expect overlying absorbing aerosols to be spatially homogeneous.

140 3. *Non-precipitating brightening.* For thinner non-precipitating clouds ( $LWP < 50 \text{ g m}^{-2}$ ), cloud-top entrainment efficiency is much reduced, compared to thicker clouds (Hoffmann et al., 2020), and LW cooling surpasses SW heating at cloud tops (Petters et al., 2012), making it easy for the Twomey effect to overcome the cloud thinning processes and dominate the  $A_c$  response.

150 Although different stratocumulus basins have different cloud state distributions in the  $LWP-N_d$  variable space, the non-precipitating brightening and the precipitating brightening regimes remain rather persistent – that is cloud states to the left of the 12-15  $\mu\text{m}$  isolines and cloud states with  $LWP < 50 \text{ g m}^{-2}$ , respectively. In contrast, cloud states associated with a darkening potential vary from basin to basin, from almost absent over the NE Atlantic (occurring  $\sim 2\%$  of the time) to occurring  $\sim 32\%$  of the time over the SE Atlantic and  $\sim 34\%$  over the SE Pacific (Fig. 2). This sensitivity of the darkening regime to ocean basin (discussed further in the following sections) is consistent with a dependence of LWP adjustment to meteorological conditions (e.g. Zhang et al., 2022; Gryspeerd et al., 2019; Possner et al., 2020). When all marine low clouds are combined in the  $LWP-N_d$  space (Fig. 2a), one may conclude a predominant cloud brightening potential and a lack of cloud darkening potential, which is not the case for 3 of the Earth’s major semi-permanent stratocumulus decks (Fig. 2b-d).

155 To learn how these susceptibility regimes constitute the overall albedo susceptibility of each geographical location, we quantify the frequency of occurrence (Fig. 3) of each susceptibility regime and their contributions to the overall  $F_0$  (Fig. 4) for  $5^\circ \times 5^\circ$  oceanic areas globally, based on the sign of  $S_0$  and an  $r_e$  of 12  $\mu\text{m}$  (above which clouds are more likely to drizzle) as manifested in the  $LWP-N_d$  variable space. Clearly, the three susceptibility regimes have distinct geographical preferences (Fig. 3 and 4). The non-precipitating brightening regime occurs the most frequently over the shallow, often polluted, stratus/stratocumulus off the coast of continents and tends to dominate the  $F_0$  therein (Fig. 3a and 4a). The precipitating brightening regime, although occurring over 50% of the time over most parts of the remote, clean oceans and the equatorial eastern Pacific (Fig. 3c), contributes to the overall  $F_0$  in a limited way (Fig. 4c), due to the low areal coverage of these often precipitating clouds (disorganized or open-cellular form). In between the geographical preferences of the above two regimes lies the region where the darkening regime (mostly non-raining) becomes the leading contributor to the overall  $F_0$ , especially over the SE Pacific and Atlantic (Fig. 3b and 4b), where net warming potentials are observed (Fig. 1).

165

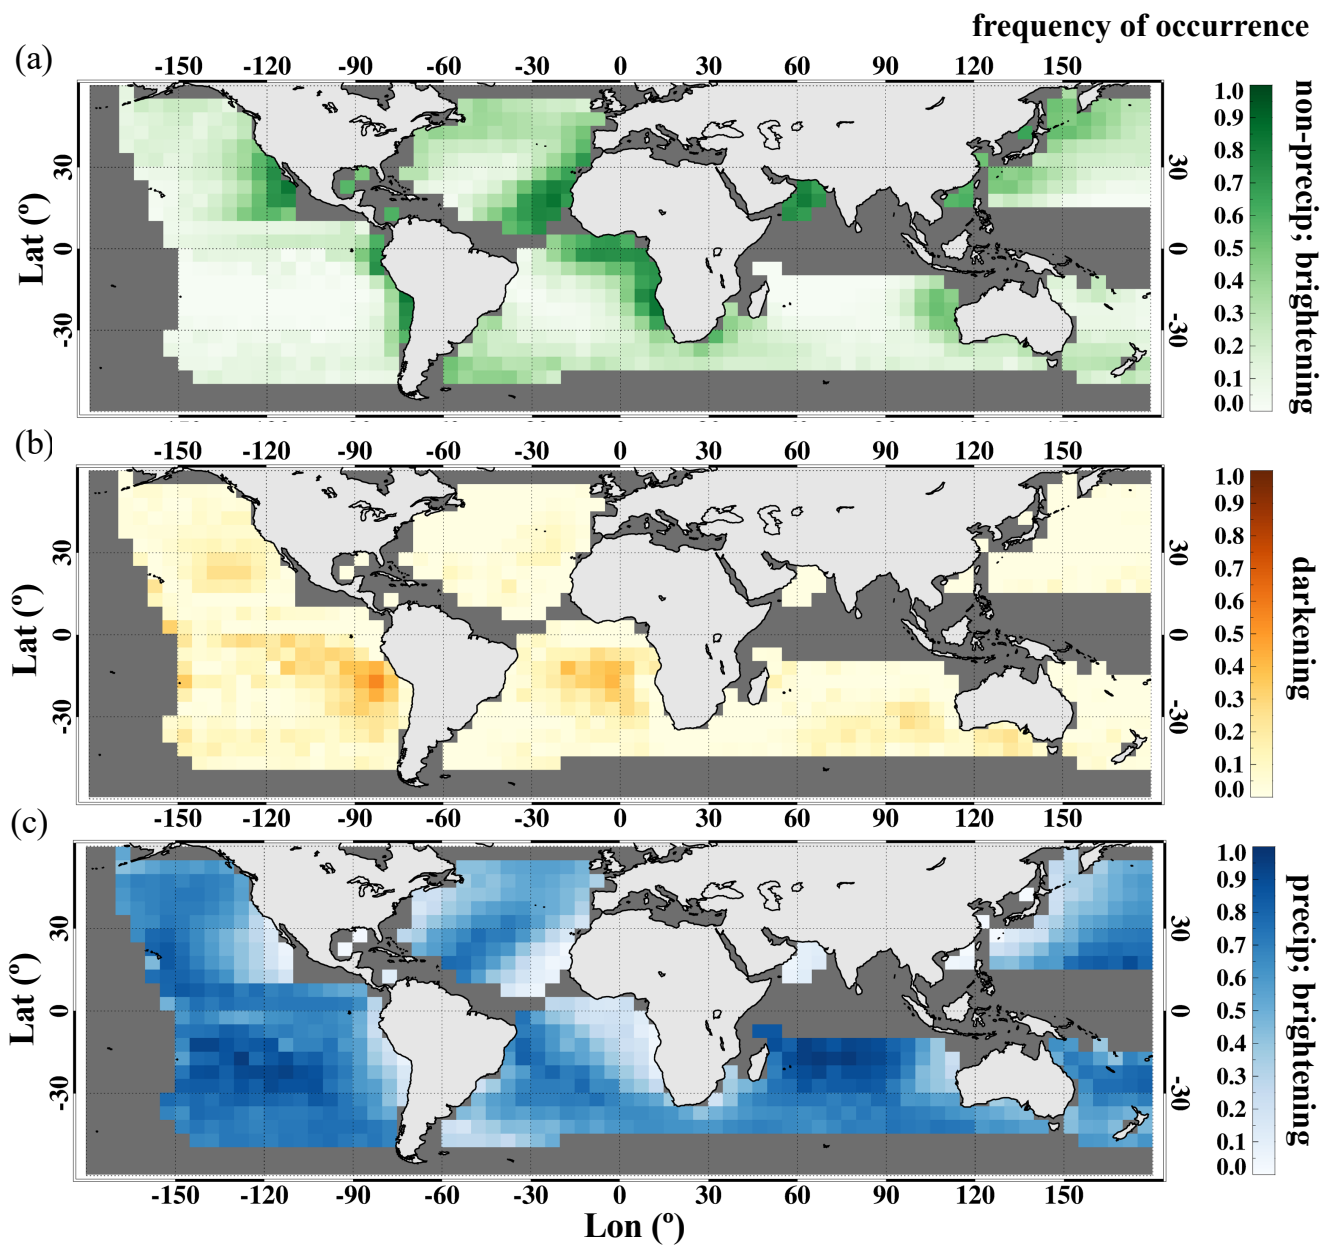

**Figure 3.** Geographical distribution of the frequency of occurrence of the 3 susceptibility regimes: (a) non-precipitating brightening, (b) darkening, and (c) precipitating brightening. The 3 regimes are separated based on the sign of  $S_0$  and a  $r_e$  of  $12 \mu\text{m}$  in the LWP- $N_d$  variable space, for  $5^\circ \times 5^\circ$  areas, similarly to Zhang et al. (2022). Only areas with SLLC frequency of occurrence greater than 0.1 are shown.

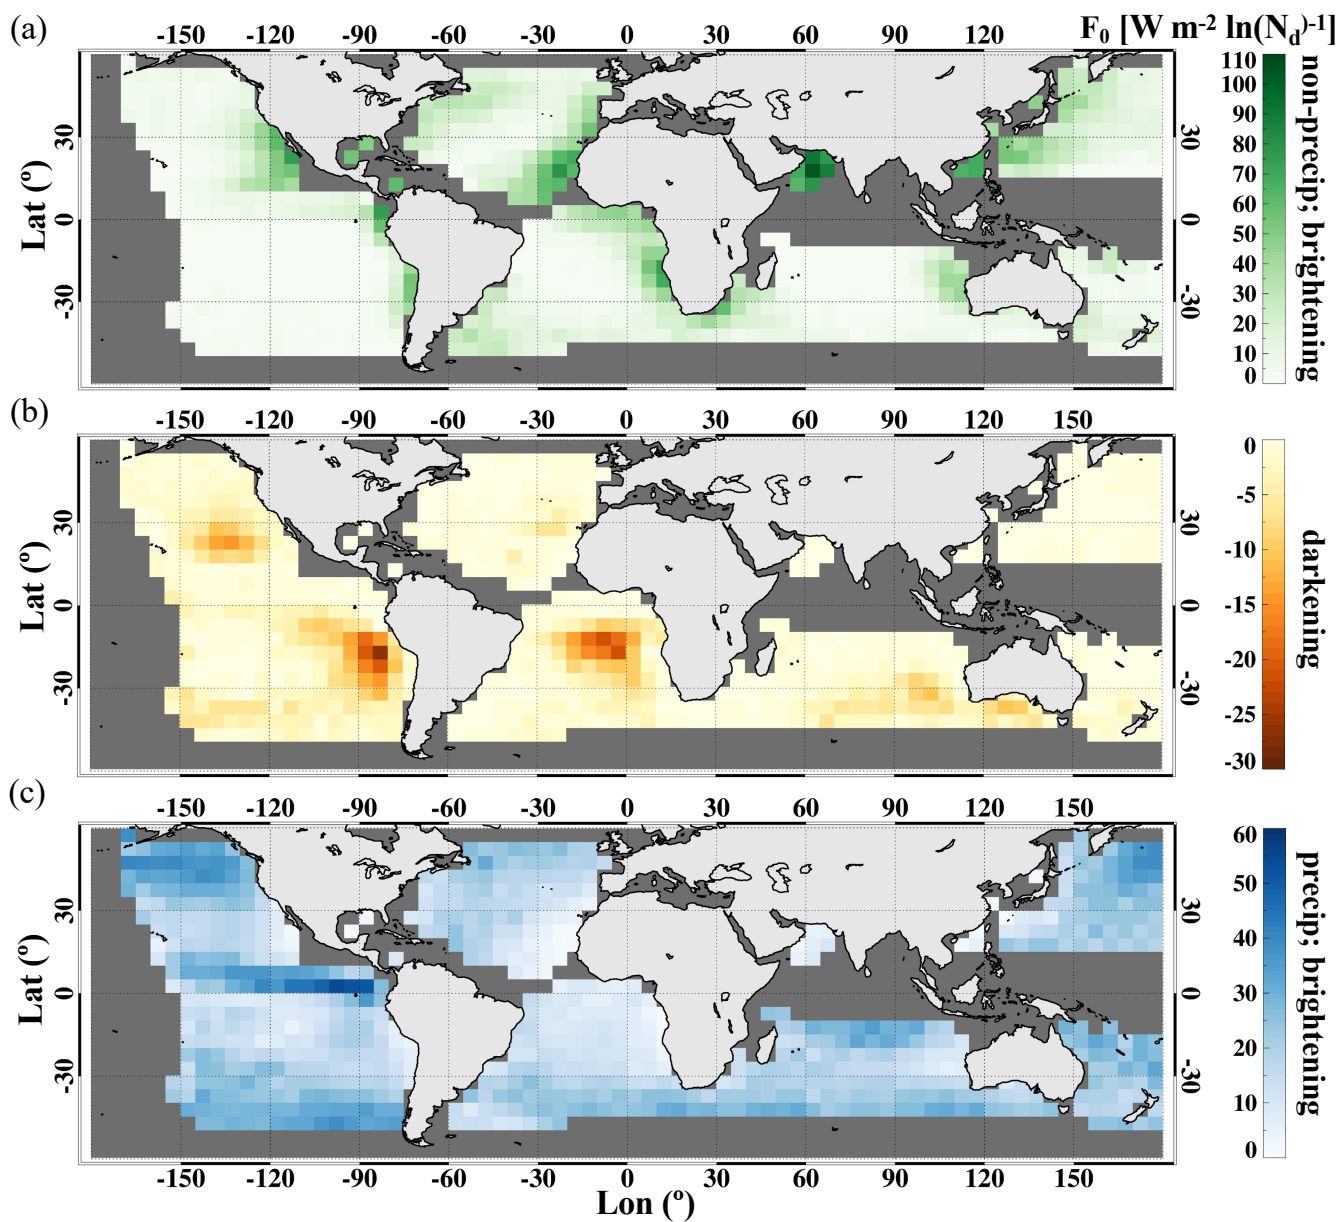

**Figure 4.** As in Fig. 3, but showing radiative susceptibility ( $F_0$ ).

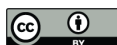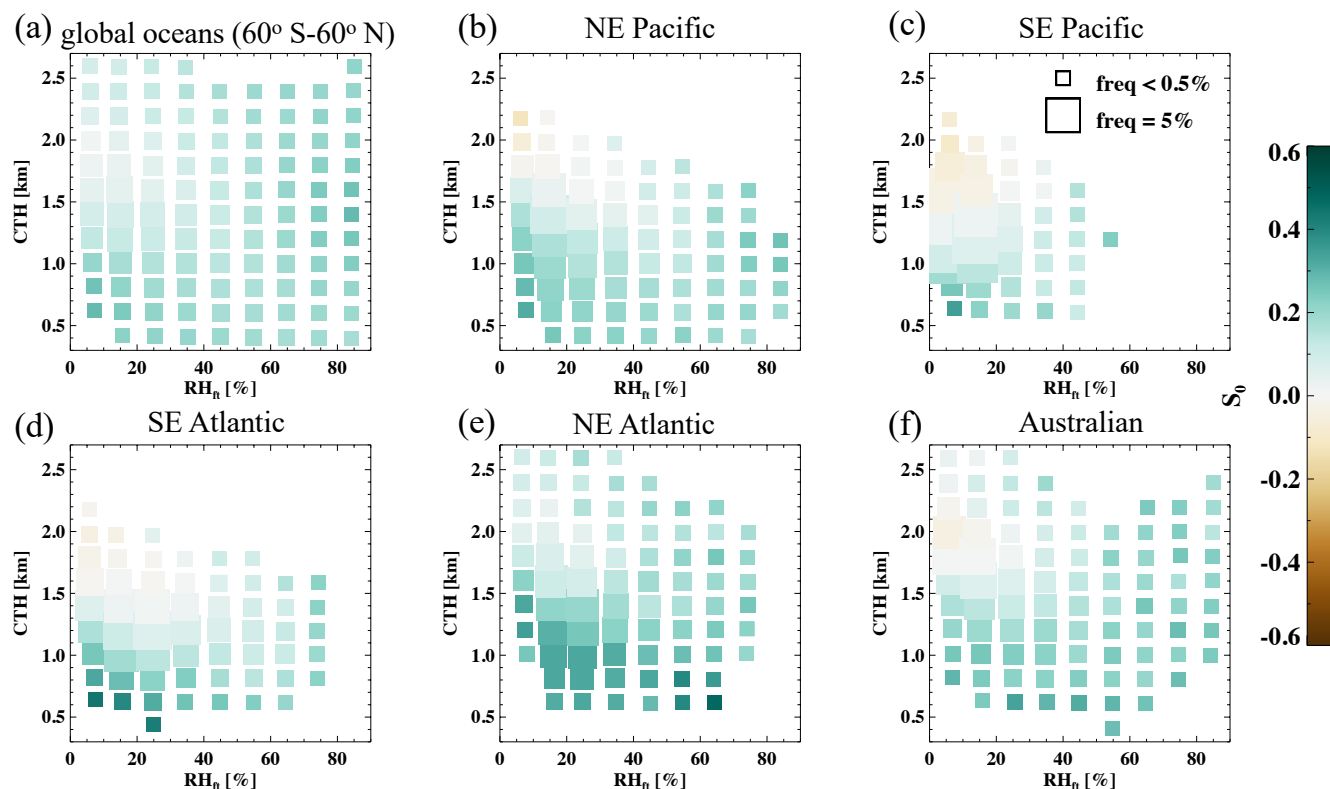

**Figure 5.** Mean  $S_0$  under different meteorological conditions, namely free-tropospheric relative humidity ( $RH_{ft}$ ; x-axis) and cloud top height (CTH; y-axis; a proxy for the marine boundary layer depth), for (a) global oceans ( $60^\circ$  S -  $60^\circ$  N), (b) NE Pacific, (c) SE Pacific, (d) SE Atlantic, (e) NE Atlantic, and (f) Australian stratocumulus regions. Bin sizes for CTH and  $RH_{ft}$  are 0.2 km and 10%, respectively. The size of the square indicates the frequency of occurrence of a meteorological state. Bins with less than 0.1% frequency of occurrence (or less than 100 samples) are not shown.

#### 4 Distinct distributions of $S_0$ in 2-variable meteorological space at regional scale

Local adjustments of low clouds to aerosol perturbations are strongly dependent on the depth of the stratocumulus-topped MBL (approximated by CTH; e.g. Possner et al., 2020; Toll et al., 2019), which is often capped by a strong inversion, and  $RH_{ft}$  (e.g. Chen et al., 2014; Gryspeerd et al., 2019). Figure 5 shows  $S_0$  under different MBL and free-troposphere (FT) states, as a function of CTH and  $RH_{ft}$ . Globally ( $60^\circ$  S -  $60^\circ$  N), positive  $S_0$  is found everywhere across the two meteorological state-spaces, with less susceptible conditions occurring under drier FT and intermediate MBL depth ( $\sim 1.5$  km; Fig. 5a). This is consistent with the SW heating and the entrainment feedback arguments (Section 3.2-2) that reduced droplet sizes lead to stronger SW heating and entrainment mixing at cloud tops (Petters et al., 2012; Bretherton et al., 2007; Xue and Feingold, 2006), which is further facilitated by the deeper MBL and the drier air above cloud tops. As clouds become even deeper ( $> 2$  km), the likelihood of precipitation increases and the cloud brightening potential overwhelms the darkening potential (Fig. 5).





When the stratocumulus regime is singled out (Fig. 5b-f), the  $S_0$  distribution in the two meteorological states is in qualitative agreement with the global analysis, however, cloud darkening (negative  $S_0$ ) appears under the deep-MBL, dry-FT atmospheric states, more pronouncedly over the southeast Pacific stratocumulus deck (Fig. 5c), while weak brightening potential is observed under those conditions over the NE Atlantic (Fig. 5e). This is likely because clouds over the NE Atlantic precipitate more often than those over the SE Pacific, under these MBL and FT conditions (discussed further in Section 5).

Distinct “fingerprints” of  $S_0$ , characterized by the sign of  $S_0$  (indicated by the colors) and the frequency of occurrence of meteorological states (indicated by the square sizes), in the CTH– $RH_{ft}$  variable space are evident, when individual basins are being compared (Fig. 5). This manifests in two ways; first, the frequency of occurrence of the FT and MBL conditions varies from basin to basin. For example, deep MBL (>2 km) or humid FT conditions rarely occur under the large-scale subsidence-dominated regions (Fig. 5b-d), compared to the NE Atlantic or the Australian basins (Fig. 5e-f). Second, different  $S_0$ , at least in magnitude, and in some cases even in sign, are observed across basins. This suggests cloud states (defined in LWP,  $N_d$  space) are not necessarily the same for the same MBL and FT states, implying that other meteorological factors co-evolve with MBL and FT states differently from region to region, leaving distinct imprints on  $S_0$ . These distinct regional “fingerprints” of  $S_0$ -meteorology relationships are **lost in the global analysis** (Fig. 5a) due to the merging of different cloud/meteorology regimes besides MBL depth and  $RH_{ft}$ .

## 5 Monthly covariabilities: Meteorology, albedo susceptibility, and aerosol conditions

### 5.1 Meteorological covariability

Four key large-scale meteorological factors evolve and co-vary distinctly across basins (Fig. 6, right column), leading to markedly different monthly evolution in  $F_0$  (Fig. 6, left column). Even among regions strongly influenced by large-scale subsidence (Fig. 6a-c), large-scale meteorological conditions vary in magnitude and do not covary the same way temporally (e.g.  $RH_{ft}$  tracks SST except over the SE Atlantic, LTS anti-correlates with SST except over the NE Pacific). As a result of the complex and distinct regional covariability in meteorological conditions, the temporal rise and fall of a single meteorological factor leads to markedly different responses in  $F_0$  across basins. For instance, when LTS peaks over the Australian stratus region,  $F_0$  is at its annual maximum (Fig. 6e, January). In contrast, over the SE Atlantic, the peak LTS season (September-October) corresponds to less susceptible conditions, whereas the most susceptible clouds of this region are found during a transition of large-scale conditions (i.e. SST decreases and LTS increases, June-July, Fig. 6c), during which the non-precipitating brightening regime occurs the most frequently (Fig. 7c). Taking CTH as another example, high CTHs (deep MBLs) lead to strong precipitating brightening over the NE Atlantic, whereas deep MBLs over the SE Pacific show very weak brightening potentials, due to high stability and dry FT conditions, in striking contrast to the NE Atlantic (Fig. 6b and d). In other words, when  $F_0$  or  $S_0$  peaks, this is associated with different combinations of large-scale meteorological conditions in the different basins. Although certain environmental conditions are known to favor susceptible clouds, e.g. a humid free-troposphere and/or strong LTS (Chen et al., 2014), one may not be able to find susceptible clouds under such conditions over some regions due to these regionally distinct meteorological covariabilities.

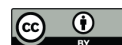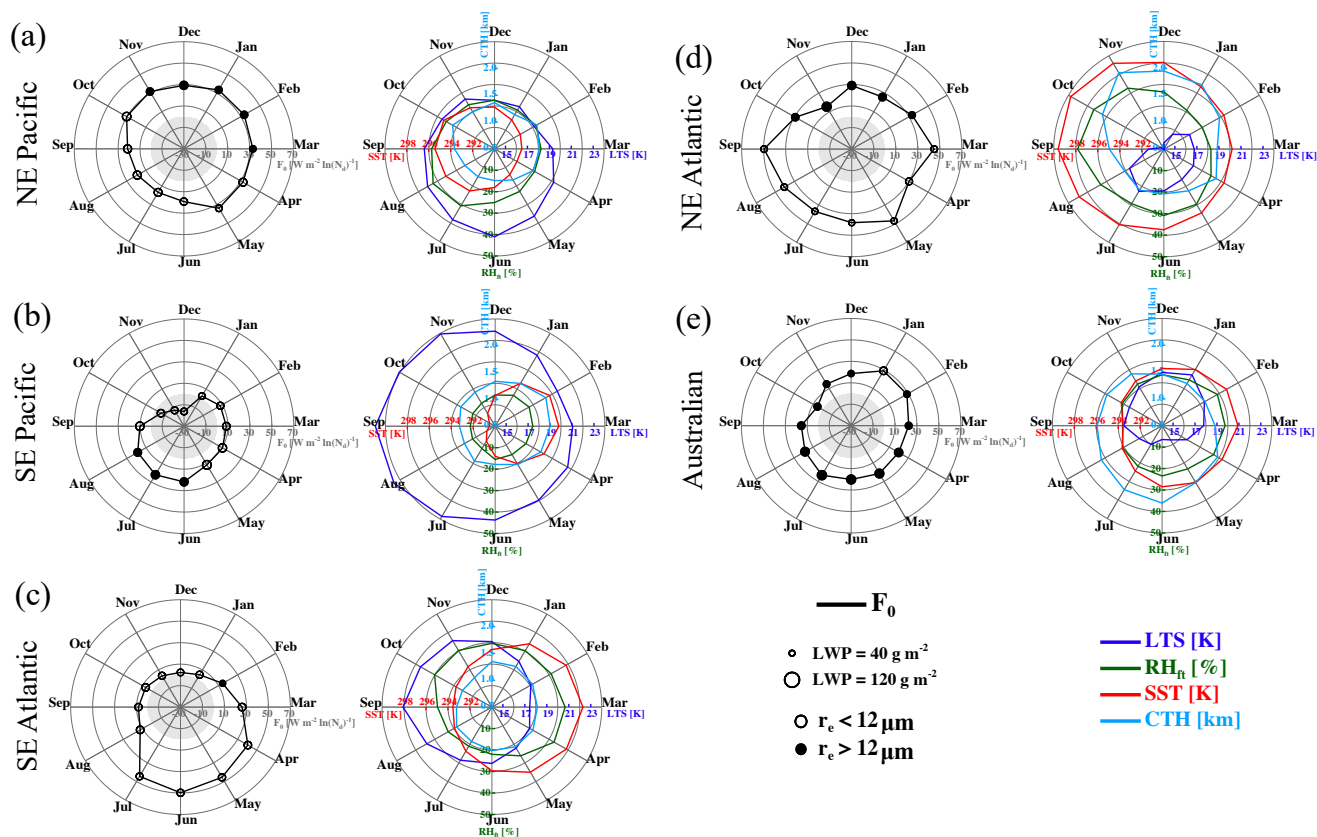

**Figure 6.** Left column: Monthly mean radiative susceptibility ( $F_0$ ; black; positive values indicate cooling). Size of the circle indicates monthly mean LWP. Open (closed) circles indicate likely precipitating (non-precipitating) condition, based on  $r_e = 12 \mu\text{m}$ . Right column: Monthly mean meteorological conditions: LTS (blue),  $RH_{ft}$  (dark green), SST (red), and CTH (cyan). Rows (a–e) represent results for the NE Pacific, SE Pacific, SE Atlantic, NE Atlantic, and the Australian stratocumulus regions, respectively.

The covariability among large-scale meteorological factors over the SE Atlantic follows that over the SE Pacific, although the ocean surface is warmer, LTS is weaker, and the FT is moister in general over the SE Atlantic (Fig. 6c). This leads to qualitatively similar  $F_0$  evolutions between the two basins; i.e., high  $F_0$  during austral winter and low  $F_0$  during austral summer. An exception occurs during late fall to winter (June–July), when precipitating clouds over the SE Pacific exhibit relatively weak positive  $F_0$  whereas non-precipitating high  $N_d$  clouds occur and exhibit strong  $F_0$  over the SE Atlantic. This difference can be attributed to an aerosol source that is unique to the SE Atlantic basin, in the form of a large amount of biomass burning aerosol that is advected by the co-occurring African Easterly Jet in the FT during the southern African burning season (June–October; Adebisi and Zuidema, 2016). The elevated aerosol is likely to be entrained into the MBL during June–July when the FT jet is not yet at its full strength (Zhang and Zuidema, 2021).

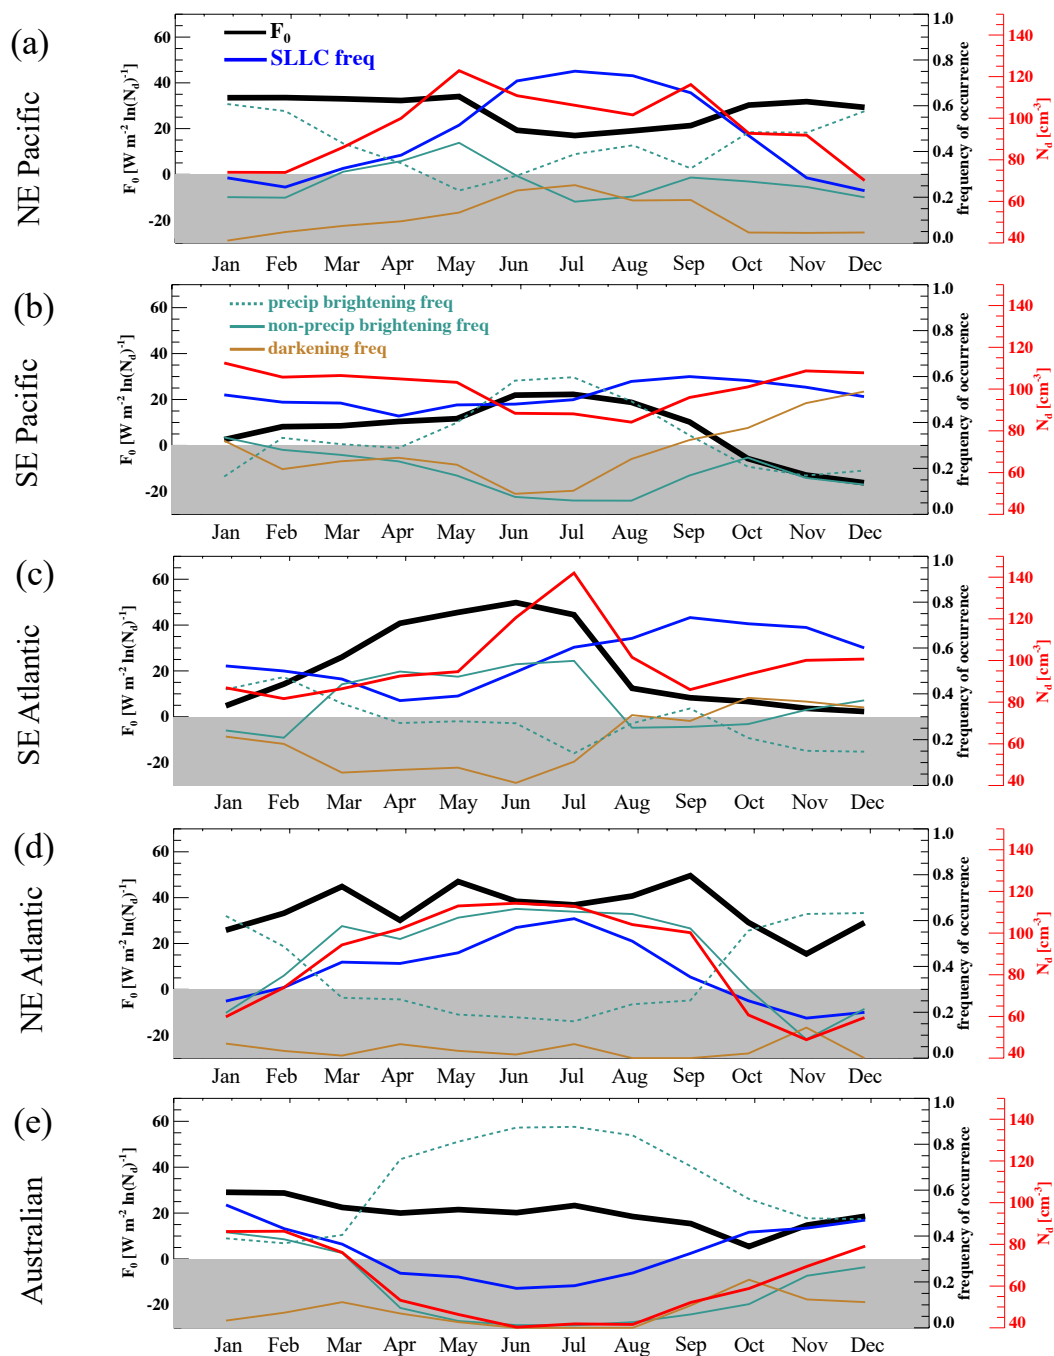

**Figure 7.** Monthly mean radiative susceptibility ( $F_0$ ; black), frequency of occurrence of SLIC (blue), monthly mean  $N_d$  (red), and the frequency of occurrence of the 3 susceptibility regimes: non-precipitating brightening (solid green), darkening (brown), and precipitating brightening (dotted green). Rows (a–e) represent results for the NE Pacific, SE Pacific, SE Atlantic, NE Atlantic, and the Australian stratocumulus regions, respectively.



Among five subtropical stratocumulus/stratus regions, the SE Pacific hosts the least susceptible conditions overall and is the only basin with monthly mean cloud darkening potential (Fig. 6b). This is consistent with the extremely dry free-tropospheric conditions observed therein, under which entrainment mixing at cloud tops can be extremely effective in reducing cloud LWP (thinning the clouds), and even more so when droplet sizes are reduced due to increasing aerosol. Low clouds over the NE Atlantic indicate the highest cloud brightening potential among the five regions, especially during March-September when the MBL is shallow and FT is relatively moist, giving rise to thin, non-precipitating clouds with low LWP, relatively high  $N_d$ , and the lowest frequency of occurrence of the darkening regime (Fig. 6d and 7d). During October-February over the NE Atlantic, when CTH is high (deep MBL), clouds precipitate often, leading to a frequently occurring precipitating brightening regime (Fig. 7d). Given the deep MBLs, precipitating conditions occur fairly frequently over the Australian stratus region almost throughout the year, except for the January-March period when increasing LTS leads to lower LWP and shallower MBL (Fig. 6e). As a result, the precipitating brightening regime dominates almost all-year-round, with the non-precipitating brightening regime contributing only during austral summer (December-March) (Fig. 7e).

## 5.2 Albedo susceptibility and aerosol covariability

Albedo susceptibility, cloud frequency and areal coverage, and aerosol conditions (indicated by  $N_d$ ) collectively determine the SW flux budget at TOA in response to an aerosol perturbation. The temporal covariability among these variables can lead to a muted SW flux perturbation even when highly susceptible clouds occur (black curve), due to a coinciding low frequency of cloud occurrence (blue curve) and/or high aerosol conditions (red curve; Fig. 7). For example,  $F_0$  peaks when  $N_d$  reaches its annual maximum over the SE and the NE Atlantic (Fig. 7c and d), and low cloud frequency of occurrence peaks when the clouds are the least susceptible over the NE Pacific (Fig. 7a). This stresses the necessity of taking such temporal covariability into account when assessing the climatological radiative effect of aerosol-cloud interactions.

$$\Delta SW_{TOA} = F_0 \times \overline{SLLC_{freq}} \times \frac{\Delta N_d}{N_d} \quad (1)$$

$$\Delta SW_{TOA}^* = \overline{F_0} \times \overline{SLLC_{freq}} \times \frac{\Delta N_d}{N_d} \quad (2)$$

Furthermore, not only do various spatial-temporal averages applied in satellite-based approaches lead to biased susceptibilities (Feingold et al., 2022), temporal covariabilities among multiplicands ( $F_0$ , cloud frequency, and aerosol condition) also bias their product (TOA SW flux perturbation) if temporal averages are applied to multiplicands before multiplication (Eqn. 2), compared to multiplication before averaging (Eqn. 1) (Fig. 8). Biases associated with individual stratocumulus regions vary in sign and magnitude, indicating that these quantities do not necessarily co-vary the same way temporally across basins (e.g., the NE versus SE Pacific).

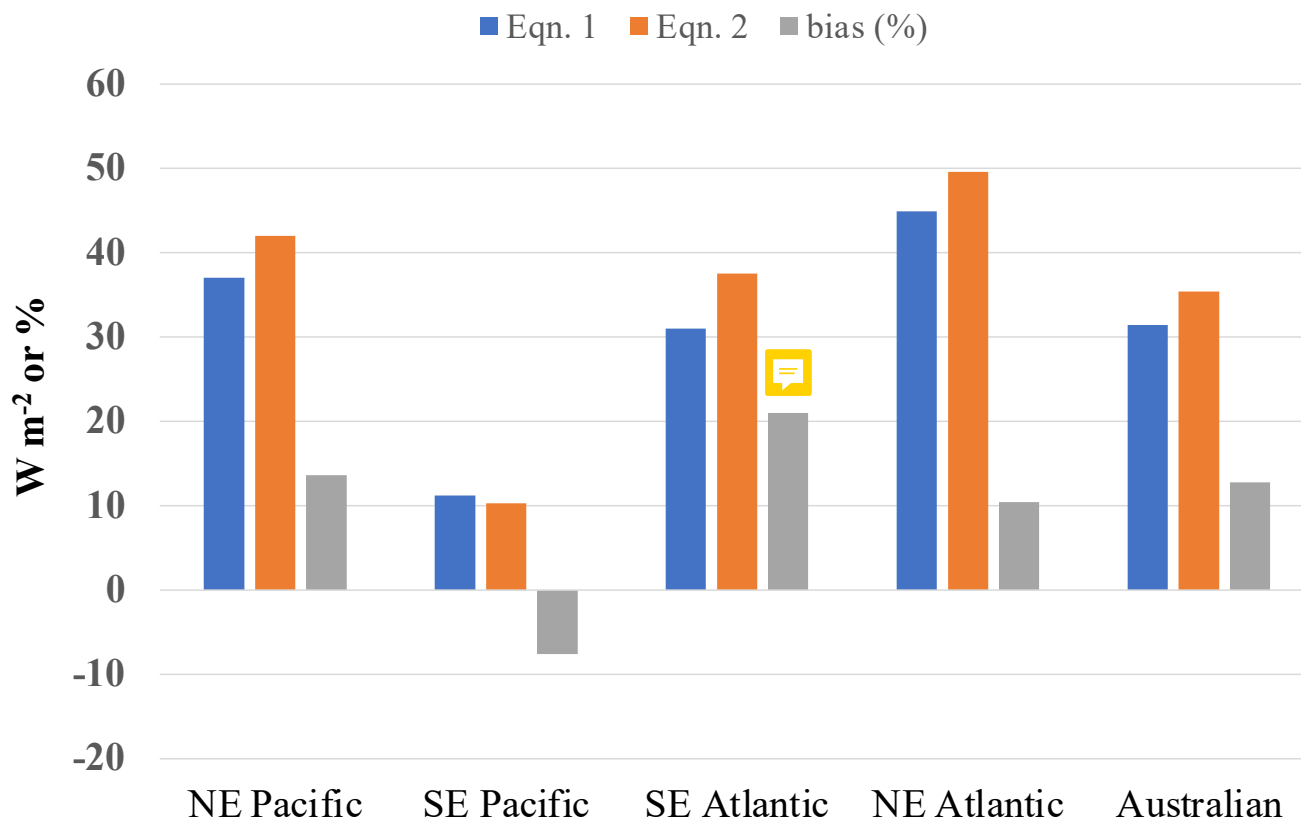

**Figure 8.** Integrated annual-mean regional TOA SW flux perturbation in  $\text{W m}^{-2}$  (assuming a  $300 \text{ cm}^{-3} \Delta N_d$ ) based on Eqn. 1 (blue) and Eqn. 2 (orange), as well as percentage biases between the two ( $(\text{Eqn. 2} - \text{Eqn. 1})/\text{Eqn. 1}$ ; gray). Monthly mean values from Fig. 6 in the main text are used. Overbars in the equations indicate temporal average.

## 6 Discussion and implications

$S_0$  and  $F_0$ , including the 3 susceptibility regimes, derived from the morning observations (Terra; Fig. S4-S6) have very similar geographical distributions as those observed in the afternoon (Aqua; Fig. 1-4), except for the remote part of the subtropical stratocumulus deck over the SE Pacific, where the morning observation indicates a notable brightening potential (Fig. S4b) whereas the afternoon observations indicate weak darkening potentials (Fig. 1b). This is likely because clouds precipitate more readily at this location during the Terra observing time, i.e., there is a rather strong precipitating brightening potential that is absent in the Aqua analysis (Fig. S6c and Fig. 4c). This interesting difference between Aqua and Terra analyses points to another layer of complexity in characterizing and quantifying albedo susceptibility – that is the role of the low cloud diurnal cycle. Moreover, Terra observations indicate a slightly higher global mean  $S_0$  of 0.14, compared to 0.13 for Aqua observations. While the qualitative distributions of  $S_0$  in the CTH–RH<sub>ft</sub> state space remain the same, regardless of the observing time,



the morning observations (Fig. S7) do indicate a general shift towards  $S_0 > 0$ , which replaces the cloud darkening potentials related to the deep-MBL dry-FT conditions (Fig. 5) with a weak brightening potential. This, again, stresses the importance of cloud diurnal evolution for  $S_0$  in that the same meteorological conditions may lead to opposing susceptibility regimes (i.e., brightening versus darkening) depending on the time of the day. Except for generally higher cloud LWP and higher  $F_0$ , the characterized meteorological covariabilities and the covariability among  $N_d$ , SLLC frequency of occurrence, and  $F_0$  for each stratocumulus basin using the Terra observations (Fig. S8-9) agree well with those using the Aqua observations (Fig. 6-7). Although the seasonal trend in  $F_0$  is the same between Aqua and Terra observations, the role of the diurnal cycle is manifested in the timing when monthly  $F_0$  peaks (e.g. a lag of a month over the NE Pacific and the SE Atlantic; Fig. S9 and Fig. 7).

Our work is highly relevant to assessment of the radiative effect of aerosol-cloud interactions for climate applications. In addition, our findings have direct implications for marine cloud brightening (MCB), which has been proposed as a way to mitigate the worst effects of the ongoing global warming crisis by creating more reflective (in the SW) MBL clouds, ideally with expanded areal coverage and prolonged lifetime, through deliberate aerosol injections (Latham et al., 2012). The bright, linear cloud features seen in satellite images, referred to as ship tracks (Coakley et al., 1987), are examples of ideal outcomes of an MCB experiment, and the conditionality of such an outcome on meteorological conditions is one of the key issues underpinning the viability of MCB. This study underscores two key points for the MCB community: 1) understanding or evaluating the impact of meteorology on cloud albedo susceptibility needs to be done at local/regional scales, where meteorological covariability is accounted for; 2) When scaling up the flux perturbation, it is crucial to consider the natural covariability between meteorology and aerosol, to which cloud responses to aerosol perturbation are sensitive. The latter point stresses the importance of shifting our attention from finding the most susceptible clouds to finding susceptible clouds that co-occur with favorable conditions (e.g. low background  $N_d$ , Fig. 7), as the amount of cloud brightening due to aerosol injection depends strongly on the background  $N_d$  (e.g. Wang et al., 2011; Hu et al., 2021).

Although it is quite straightforward nowadays for one to assess how much of an aerosol perturbation is needed to achieve a certain increase in reflective SW using cloud-resolving simulation experiments (e.g. Wang et al., 2011; Chun et al., 2022), these modeling experiments are often state and scale specific (i.e. sensitive to the initial conditions of the simulations) and do not consider the frequency of occurrence of environmental conditions, nor the background aerosol concentrations, both of which are crucial for scaling up the responses. Therefore, before global cloud-resolving simulation (the scale issue; e.g. Khairoutdinov et al., 2022) and a large ensemble of simulations that represent a full range of conditions are readily available (the initial state issue; e.g. Glassmeier et al., 2019, 2021), long-term satellite estimates of albedo susceptibility and flux perturbation that cover the full spatiotemporal frequency of occurrence of environmental conditions world-wide are an important asset for MCB research.

Another key implication of this study is that on the path towards understanding the influence of meteorology on aerosol-cloud interactions, efforts have been made to analyze the entire low cloud population collectively (globally) (e.g. Chen et al., 2014), while our study suggests such global analyses (e.g. Fig. 2a and Fig. 5a) do not always represent what happens regionally. In other words, while certain combinations of meteorological conditions appear to favor susceptible conditions in a global analysis, one may not be able to find such combinations at a given geographical location of interest, owing to the regionally



distinct meteorological covariability, and it is also likely that a different combination of meteorological conditions hosts the most susceptible clouds of that location.

To illustrate our findings in a conceptual framework one may ideally construct a manifold that depicts  $S_0$  in a 4-dimensional (SST, CTH,  $RH_{ft}$ , and LTS) space by populating the 4-D space with a large body of realizations, i.e., climatological observations. However, often ignored is that each realization used to construct the 4-D manifold is associated with a specific combination of longitude, latitude, and time. In other words, given a certain geographical region and time, realizations will only populate parts of the 4-D space, leading to local constructions (distinct regional “fingerprints”) that look different from a global construction.

## 300 7 Concluding Remarks

Marine warm cloud albedo susceptibility is derived from satellite-retrieved cloud microphysical properties and radiative fluxes, and sorted by day and geographical location. Geographical distributions of albedo susceptibility and the contributions from three susceptibility regimes (non-precipitating brightening, darkening, precipitating brightening) are shown over global oceans (60° S to 60° N). Monthly evolutions in cloud radiative susceptibility, meteorological conditions (from ERA5 reanalysis), warm cloud frequency of occurrence, LWP and  $N_d$  are shown for five primary eastern subtropical stratus/stratocumulus regions (20° × 20°), to illustrate the covariabilities among them. The key findings are as follows:

1. An overall annual mean cloud brightening potential is observed for global marine warm clouds – most pronounced over subtropical coastal regions where shallow marine stratocumulus prevail along with high annual-mean  $N_d$ , and over the equatorial eastern Pacific where clouds rain more often (Fig. 1).
- 310 2. Cloud darkening associated with entrainment-driven negative LWP adjustments offsets the cloud brightening potential over remote parts of the stratocumulus regions where deeper MBLs favor cloud top entrainment, especially over the SE Pacific/Atlantic where darkening overcomes brightening in the annual mean (Fig. 1 and Fig. 3-4).
3. The distinct regional “fingerprints” of  $S_0$  in the LWP- $N_d$  and CTH- $RH_{ft}$  variable spaces are absent in the global analysis because different low cloud and meteorology regimes are merged in a global analysis (Figs. 2 and 5).
- 315 4. Meteorological conditions have distinct regional covariabilities, leading to markedly different monthly evolutions in  $F_0$  (Fig. 6).
5. The SE Pacific, a region with the driest free-tropospheric conditions, hosts the least susceptible clouds exhibiting cloud darkening potential over several months during austral winter. Frequently occurring non-precipitating low-LWP, high- $N_d$  clouds, found in shallow MBLs (March-September) over the NE Atlantic, represent the highest potential radiative responses to  $N_d$  perturbations among the five stratocumulus regions (Fig. 6-7).
- 320 6. While the qualitative agreement between Terra and Aqua underscores the robustness of our findings, their quantitative disagreement points to the important role of cloud diurnal evolution in determining albedo susceptibility (Figs S4-S9).



7. In the search for the best targets for MCB, should such efforts be attempted, decisions should be made based not only on meteorological regimes, season, and time of day that produce the most susceptible clouds, but also the background  $N_d$  (aerosol loading), which co-varies spatiotemporally with the susceptibility of the clouds (Fig. 7).  
325

When the influence of meteorological conditions on low cloud  $S_0$  are studied, it may seem tempting to try to disentangle effects of individual meteorological factors on  $S_0$  by controlling for the others. Our results, however, indicate that this may not be the best approach since it is the natural covariability among meteorological conditions that dictates the regionally distinct temporal evolution in  $S_0$ . These results convey the importance of spatiotemporal variability in  $S_0$  as a basis for both understanding the limitation in scale-up of the meteorological influences on the radiative effect of aerosol-cloud interactions from regional to global, as well as for making decisions regarding when, where, and if marine cloud brightening efforts should be attempted.  
330

*Data availability.* The CERES SSF data are publicly available from NASA's Langley Research Center (<https://satcorps.larc.nasa.gov/>) (Su et al., 2015). The fifth-generation ECMWF (ERA5) atmospheric reanalyses of the global climate data are available through the Copernicus Climate Change Service (C3S, <https://cds.climate.copernicus.eu/>) (Hersbach et al., 2020).  
335

*Author contributions.* JZ and GF designed the study. JZ carried out the analysis and wrote the manuscript. Both authors contributed to the interpretation of the results and finalizing the paper.

*Competing interests.* Graham Feingold is a co-editor of ACP. Other than this, the authors declare that they have no conflict of interests

*Acknowledgements.*

340 *Financial support.* This research has been supported in part by the U.S. Department of Energy, Office of Science, Atmospheric System Research Program Interagency Award 89243020SSC000055, the U.S. Department of Commerce, Earth's Radiation Budget grant, NOAA CPO Climate & CI #03-01-07-001, and the NOAA Cooperative Agreement with CIRES, NA17OAR4320101.



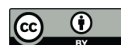

## References

- Ackerman, A. S., Kirkpatrick, M. P., Stevens, D. E., and Toon, O. B.: The impact of humidity above stratiform clouds on indirect aerosol  
345 climate forcing, *Nature*, 432, 1014–1017, 2004.
- Adebiyi, A. A. and Zuidema, P.: The role of the southern African easterly jet in modifying the southeast Atlantic aerosol and cloud environ-  
ments, *Q. J. Roy. Meteor. Soc.*, 142, 1574–1589, <https://doi.org/10.1002/qj.2765>, 2016.
- Albrecht, B. A.: Aerosols, Cloud Microphysics, and Fractional Cloudiness, *Science*, 245, 1227–1230,  
<https://doi.org/10.1126/science.245.4923.1227>, 1989.
- 350 Bender, F. A.-M., Charlson, R. J., Ekman, A. M. L., and Leahy, L. V.: Quantification of Monthly Mean Regional Scale Albedo of Marine  
Stratiform Clouds in Satellite Observations and GCMs, *J. Appl. Meteor. Climatol.*, 50, 2139–2148, <https://doi.org/10.1175/JAMC-D-11-049.1>, 2011.
- Bretherton, C. S.: A conceptual model of the stratocumulus-trade-cumulus transition in the subtropical oceans, *Proceeding of the 11th Inter-  
national Conference on Clouds and Precipitation*, vol. 1, pp. 374–377, 1992.
- 355 Bretherton, C. S., Blossey, P. N., and Uchida, J.: Cloud droplet sedimentation, entrainment efficiency, and subtropical stratocumulus albedo,  
*Geophys. Res. Lett.*, 34, L03 813, <https://doi.org/10.1029/2006GL027648>, 2007.
- Chen, Y.-C., Christensen, M. W., Xue, L., Sorooshian, A., Stephens, G. L., Rasmussen, R. M., and Seinfeld, J. H.: Occurrence of lower cloud  
albedo in ship tracks, *Atmos. Chem. Phys.*, 12, 8223–8235, <https://doi.org/10.5194/acp-12-8223-2012>, 2012.
- Chen, Y.-C., Christensen, M., Stephens, G. L., and Seinfeld, J. H.: Satellite-based estimate of global aerosol–cloud radiative forcing by  
360 marine warm clouds, *Nature Geosci.*, 7, 643–646, <https://doi.org/10.1038/ngeo2214>, 2014.
- Christensen, M. W., Gettelman, A., Cermak, J., Dagan, G., Diamond, M., Douglas, A., Feingold, G., Glassmeier, F., Goren, T., Grosvenor,  
D. P., Gryspeerd, E., Kahn, R., Li, Z., Ma, P.-L., Malavelle, F., McCoy, I. L., McCoy, D. T., McFarquhar, G., Mülmenstädt, J., Pal, S.,  
Possner, A., Povey, A., Quaas, J., Rosenfeld, D., Schmidt, A., Schrödner, R., Sorooshian, A., Stier, P., Toll, V., Watson-Parris, D., Wood,  
R., Yang, M., and Yuan, T.: Opportunistic experiments to constrain aerosol effective radiative forcing, *Atmos. Chem. Phys.*, 22, 641–674,  
365 <https://doi.org/10.5194/acp-22-641-2022>, 2022.
- Chun, J.-Y., Wood, R., Blossey, P., and Doherty, S. J.: Microphysical, macrophysical and radiative responses of subtropical marine clouds to  
aerosol injections, *Atmos. Chem. Phys. Discuss.*, under review, 1–38, <https://doi.org/10.5194/acp-2022-351>, 2022.
- Coakley, J. A., Bernstein, R. L., and Durkee, P. A.: Effect of Ship-Stack Effluents on Cloud Reflectivity, *Science*, 237, 1020–1022,  
<https://doi.org/10.1126/science.237.4818.1020>, 1987.
- 370 Dagan, G., Koren, I., and Altaratz, O.: Competition between core and periphery-based processes in warm convective clouds – from invigo-  
ration to suppression, *Atmos. Chem. Phys.*, 15, 2749–2760, <https://doi.org/10.5194/acp-15-2749-2015>, 2015.
- Eastman, R. and Wood, R.: The Competing Effects of Stability and Humidity on Subtropical Stratocumulus Entrainment and Cloud Evolution  
from a Lagrangian Perspective, *J. Atmos. Sci.*, 75, 2563–2578, <https://doi.org/10.1175/JAS-D-18-0030.1>, 2018.
- Feingold, G., Goren, T., and Yamaguchi, T.: Quantifying albedo susceptibility biases in shallow clouds, *Atmos. Chem. Phys.*, 22, 3303–3319,  
375 <https://doi.org/10.5194/acp-22-3303-2022>, 2022.
- Gerber, H.: Microphysics of Marine Stratocumulus Clouds with Two Drizzle Modes, *J. Atmos. Sci.*, 53, 1649–1662,  
[https://doi.org/10.1175/1520-0469\(1996\)053<1649:MOMSCW>2.0.CO;2](https://doi.org/10.1175/1520-0469(1996)053<1649:MOMSCW>2.0.CO;2), 1996.
- Glassmeier, F., Hoffmann, F., Johnson, J. S., Yamaguchi, T., Carslaw, K. S., and Feingold, G.: An emulator approach to stratocumulus  
susceptibility, *Atmos. Chem. Phys.*, 19, 10 191–10 203, <https://doi.org/10.5194/acp-19-10191-2019>, 2019.



- 380 Glassmeier, F., Hoffmann, F., Johnson, J. S., Yamaguchi, T., Carslaw, K. S., and Feingold, G.: Aerosol-cloud-climate cooling overestimated by ship-track data, *Science*, 371, 485–489, <https://doi.org/10.1126/science.abd3980>, 2021.
- Goren, T. and Rosenfeld, D.: Satellite observations of ship emission induced transitions from broken to closed cell marine stratocumulus over large areas, *J. Geophys. Res.-Atmos.*, 117, <https://doi.org/https://doi.org/10.1029/2012JD017981>, 2012.
- Goren, T. and Rosenfeld, D.: Decomposing aerosol cloud radiative effects into cloud cover, liquid water path and Twomey components in  
385 marine stratocumulus, *Atmos. Res.*, 138, 378–393, <https://doi.org/https://doi.org/10.1016/j.atmosres.2013.12.008>, 2014.
- Grosvenor, D. P. and Wood, R.: The effect of solar zenith angle on MODIS cloud optical and microphysical retrievals within marine liquid water clouds, *Atmos. Chem. Phys.*, 14, 7291–7321, <https://doi.org/10.5194/acp-14-7291-2014>, 2014.
- Grosvenor, D. P., Sourdeval, O., Zuidema, P., Ackerman, A., Alexandrov, M. D., Bennartz, R., Boers, R., Cairns, B., Chiu, J. C., Christensen, M., Deneke, H., Diamond, M., Feingold, G., Fridlind, A., HÄEnerbein, A., Knist, C., Kollias, P., Marshak, A., McCoy, D., Merk, D.,  
390 Painemal, D., Rausch, J., Rosenfeld, D., Russchenberg, H., Seifert, P., Sinclair, K., Stier, P., vanÄ Diedenhoven, B., Wendisch, M., Werner, F., Wood, R., Zhang, Z., and Quaas, J.: Remote Sensing of Droplet Number Concentration in Warm Clouds: A Review of the Current State of Knowledge and Perspectives, *Rev. Geophys.*, 56, 409–453, <https://doi.org/10.1029/2017RG000593>, 2018.
- Gryspeerd, E., Goren, T., Sourdeval, O., Quaas, J., Mülmenstädt, J., Dipu, S., Unglaub, C., Gettelman, A., and Christensen, M.: Constraining the aerosol influence on cloud liquid water path, *Atmos. Chem. Phys.*, 19, 5331–5347, <https://doi.org/10.5194/acp-19-5331-2019>, 2019.
- 395 Hersbach, H., Bell, B., Berrisford, P., Hirahara, S., Horányi, A., Muñoz-Sabater, J., Nicolas, J., Peubey, C., Radu, R., Schepers, D., Simmons, A., Soci, C., Abdalla, S., Abellan, X., Balsamo, G., Bechtold, P., Biavati, G., Bidlot, J., Bonavita, M., De Chiara, G., Dahlgren, P., Dee, D., Diamantakis, M., Dragani, R., Flemming, J., Forbes, R., Fuentes, M., Geer, A., Haimberger, L., Healy, S., Hogan, R. J., Hólm, E., Janisková, M., Keeley, S., Laloyaux, P., Lopez, P., Lupu, C., Radnoti, G., de Rosnay, P., Rozum, I., Vamborg, F., Villaume, S., and Thépaut, J.-N.: The ERA5 global reanalysis, *Q. J. Roy. Meteor. Soc.*, 146, 1999–2049, <https://doi.org/10.1002/qj.3803>, 2020.
- 400 Hoffmann, F., Glassmeier, F., Yamaguchi, T., and Feingold, G.: Liquid Water Path Steady States in Stratocumulus: Insights from Process-Level Emulation and Mixed-Layer Theory, *J. Atmos. Sci.*, 77, 2203–2215, <https://doi.org/10.1175/JAS-D-19-0241.1>, 2020.
- Hu, S., Zhu, Y., Rosenfeld, D., Mao, F., Lu, X., Pan, Z., Zang, L., and Gong, W.: The Dependence of Ship-Polluted Marine Cloud Properties and Radiative Forcing on Background Drop Concentrations, *J. Geophys. Res.-Atmos.*, 126, e2020JD033852, <https://doi.org/https://doi.org/10.1029/2020JD033852>, 2021.
- 405 Jiang, H., Xue, H., Teller, A., Feingold, G., and Levin, Z.: Aerosol effects on the lifetime of shallow cumulus, *Geophys. Res. Lett.*, 33, L14806, <https://doi.org/https://doi.org/10.1029/2006GL026024>, 2006.
- Khairoutdinov, M. F., Blossey, P. N., and Bretherton, C. S.: Global System for Atmospheric Modeling: Model Description and Preliminary Results, *J. Adv. Model. Earth Syst.*, 14, e2021MS002968, <https://doi.org/https://doi.org/10.1029/2021MS002968>, 2022.
- Klein, S. A. and Hartmann, D. L.: The Seasonal Cycle of Low Stratiform Clouds, *J. Climate*, 6, 1587–1606, [https://doi.org/10.1175/1520-0442\(1993\)006<1587:TSCOLS>2.0.CO;2](https://doi.org/10.1175/1520-0442(1993)006<1587:TSCOLS>2.0.CO;2), 1993.
- 410 Latham, J., Bower, K., Choullarton, T., Coe, H., Connolly, P., Cooper, G., Craft, T., Foster, J., Gadian, A., Galbraith, L., Iacovides, H., Johnston, D., Launder, B., Leslie, B., Meyer, J., Neukermans, A., Ormond, B., Parkes, B., Rasch, P., Rush, J., Salter, S., Stevenson, T., Wang, H., Wang, Q., and Wood, R.: Marine cloud brightening, *Philos. trans., Math. phys. eng. sci.*, 370, 4217–4262, <https://doi.org/10.1098/rsta.2012.0086>, 2012.
- Malavelle, F. F., Haywood, J. M., Jones, A., Gettelman, A., Clarisse, L., Bauduin, S., Allan, R. P., Karset, I. H. H., Kristjánsson, J. E., Oreopoulos, L., Cho, N., Lee, D., Bellouin, N., Boucher, O., Grosvenor, D. P., Carslaw, K. S., Dhomse, S., Mann, G. W., Schmidt, A., Coe, H., Hartley, M. E., Dalvi, M., Hill, A. A., Johnson, B. T., Johnson, C. E., Knight, J. R., O’Connor, F. M., Partridge, D. G., Stier, P.,



- Myhre, G., Platnick, S., Stephens, G. L., Takahashi, H., and Thordarson, T.: Strong constraints on aerosol-cloud interactions from volcanic eruptions, *Nature*, 546, 485–491, <https://doi.org/10.1038/nature22974>, 2017.
- 420 Mülmenstädt, J. and Feingold, G.: The Radiative Forcing of Aerosol–Cloud Interactions in Liquid Clouds: Wrestling and Embracing Uncertainty, *Curr. Clim. Change Rep.*, 4, 23–40, <https://doi.org/10.1007/s40641-018-0089-y>, 2018.
- Painemal, D.: Global Estimates of Changes in Shortwave Low-Cloud Albedo and Fluxes Due to Variations in Cloud Droplet Number Concentration Derived From CERES-MODIS Satellite Sensors, *Geophys. Res. Lett.*, 45, 9288–9296, <https://doi.org/https://doi.org/10.1029/2018GL078880>, 2018.
- 425 Painemal, D., Minnis, P., and Sun-Mack, S.: The impact of horizontal heterogeneities, cloud fraction, and liquid water path on warm cloud effective radii from CERES-like Aqua MODIS retrievals, *Atmos. Chem. Phys.*, 13, 9997–10 003, <https://doi.org/10.5194/acp-13-9997-2013>, 2013.
- Petters, J. L., Harrington, J. Y., and Clothiaux, E. E.: Radiative–Dynamical Feedbacks in Low Liquid Water Path Stratiform Clouds, *J. Atmos. Sci.*, 69, 1498–1512, <https://doi.org/10.1175/JAS-D-11-0169.1>, 2012.
- 430 Platnick, S., King, M. D., Ackerman, S. A., Menzel, W. P., Baum, B. A., Riedi, J. C., and Frey, R. A.: The MODIS cloud products: algorithms and examples from Terra, *IEEE Trans. Geos. Remote Sens.*, 41, 459–473, <https://doi.org/10.1109/TGRS.2002.808301>, 2003.
- Possner, A., Eastman, R., Bender, F., and Glassmeier, F.: Deconvolution of boundary layer depth and aerosol constraints on cloud water path in subtropical stratocumulus decks, *Atmos. Chem. Phys.*, 20, 3609–3621, <https://doi.org/10.5194/acp-20-3609-2020>, 2020.
- Rosenfeld, D., Zhu, Y., Wang, M., Zheng, Y., Goren, T., and Yu, S.: Aerosol-driven droplet concentrations dominate coverage and water of  
435 oceanic low-level clouds, *Science*, 363, eaav0566, <https://doi.org/10.1126/science.aav0566>, 2019.
- Stephens, G. L., Li, J., Wild, M., Clayson, C. A., Loeb, N., Kato, S., L’Ecuyer, T., Stackhouse, P. W., Lebsock, M., and Andrews, T.: An update on Earth’s energy balance in light of the latest global observations, *Nature Geosci.*, 5, 691–696, <https://doi.org/10.1038/ngeo1580>, 2012.
- Stevens, B. and Feingold, G.: Untangling aerosol effects on clouds and precipitation in a buffered system, *Nature*, 461, 607–613,  
440 <https://doi.org/10.1038/nature08281>, 2009.
- Su, W., Corbett, J., Eitzen, Z., and Liang, L.: Next-generation angular distribution models for top-of-atmosphere radiative flux calculation from CERES instruments: methodology, *Atmos. Meas. Tech.*, 8, 611–632, <https://doi.org/10.5194/amt-8-611-2015>, 2015.
- Toll, V., Christensen, M., Quaas, J., and Bellouin, N.: Weak average liquid-cloud-water response to anthropogenic aerosols, *Nature*, 572, 51–55, <https://doi.org/10.1038/s41586-019-1423-9>, 2019.
- 445 Trofimov, H., Bellouin, N., and Toll, V.: Large-Scale Industrial Cloud Perturbations Confirm Bidirectional Cloud Water Responses to Anthropogenic Aerosols, *J. Geophys. Res.-Atmos.*, 125, e2020JD032 575, <https://doi.org/https://doi.org/10.1029/2020JD032575>, 2020.
- Twomey, S.: Pollution and the planetary albedo, *Atmospheric Environment*, 8, 1251–1256, [https://doi.org/10.1016/0004-6981\(74\)90004-3](https://doi.org/10.1016/0004-6981(74)90004-3), 1974.
- Twomey, S.: The Influence of Pollution on the Shortwave Albedo of Clouds, *J. Atmos. Sci.*, 34, 1149–1152, [https://doi.org/10.1175/1520-0469\(1977\)034<1149:TIOPOT>2.0.CO;2](https://doi.org/10.1175/1520-0469(1977)034<1149:TIOPOT>2.0.CO;2), 1977.
- 450 vanZanten, M. C., Stevens, B., Vali, G., and Lenschow, D. H.: Observations of Drizzle in Nocturnal Marine Stratocumulus, *J. Atmos. Sci.*, 62, 88–106, <https://doi.org/10.1175/JAS-3355.1>, 2005.
- Wang, H., Rasch, P. J., and Feingold, G.: Manipulating marine stratocumulus cloud amount and albedo: a process-modelling study of aerosol-cloud-precipitation interactions in response to injection of cloud condensation nuclei, *Atmos. Chem. Phys.*, 11, 4237–4249,  
455 <https://doi.org/10.5194/acp-11-4237-2011>, 2011.



- Wang, S., Wang, Q., and Feingold, G.: Turbulence, Condensation, and Liquid Water Transport in Numerically Simulated Nonprecipitating Stratocumulus Clouds, *J. Atmos. Sci.*, 60, 262–278, [https://doi.org/10.1175/1520-0469\(2003\)060<0262:TCALWT>2.0.CO;2](https://doi.org/10.1175/1520-0469(2003)060<0262:TCALWT>2.0.CO;2), 2003.
- Wielicki, B. A., Barkstrom, B. R., Harrison, E. F., Lee, R. B., Smith, G. L., and Cooper, J. E.: Clouds and the Earth’s Radiant Energy System (CERES): An Earth Observing System Experiment, *B. Am. Meteor. Soc.*, 77, 853–868, [https://doi.org/10.1175/1520-4677\(1996\)077<0853:CATERE>2.0.CO;2](https://doi.org/10.1175/1520-4677(1996)077<0853:CATERE>2.0.CO;2), 1996.
- 460 Wood, R.: Cancellation of Aerosol Indirect Effects in Marine Stratocumulus through Cloud Thinning, *J. Atmos. Sci.*, 64, 2657–2669, <https://doi.org/10.1175/JAS3942.1>, 2007.
- Wood, R.: Stratocumulus Clouds, *Mon. Wea. Rev.*, 140, 2373–2423, <https://doi.org/10.1175/MWR-D-11-00121.1>, 2012.
- Wyant, M. C., Bretherton, C. S., Rand, H. A., and Stevens, D. E.: Numerical Simulations and a Conceptual Model of the Stratocumulus to Trade Cumulus Transition, *J. Atmos. Sci.*, 54, 168–192, [https://doi.org/10.1175/1520-0469\(1997\)054<0168:NSAACM>2.0.CO;2](https://doi.org/10.1175/1520-0469(1997)054<0168:NSAACM>2.0.CO;2), 1997.
- 465 Xue, H. and Feingold, G.: Large-Eddy Simulations of Trade Wind Cumuli: Investigation of Aerosol Indirect Effects, *J. Atmos. Sci.*, 63, 1605–1622, <https://doi.org/10.1175/JAS3706.1>, 2006.
- Zhang, J. and Zuidema, P.: Sunlight-absorbing aerosol amplifies the seasonal cycle in low-cloud fraction over the southeast Atlantic, *Atmos. Chem. Phys.*, 21, 11 179–11 199, <https://doi.org/10.5194/acp-21-11179-2021>, 2021.
- 470 Zhang, J., Zhou, X., Goren, T., and Feingold, G.: Albedo susceptibility of northeastern Pacific stratocumulus: the role of covarying meteorological conditions, *Atmos. Chem. Phys.*, 22, 861–880, <https://doi.org/10.5194/acp-22-861-2022>, 2022.
